# Supplementary material
Source: Research Square preprint supplement (doi:10.21203/rs.3.rs-9070952/v1)
Supplement: Supplementary file 2 [file 430e61a59eed2b0cc26c69a6.docx]

**Online Appendix 1**

Architectural Phase Transition Governs AI Reliability Beyond the Single-Agent Ceiling: Evidence from 4,680 Controlled Evaluations

Kuldeep Kumar Pandit, Vatsala Kuldeep Pandit, Aayan Pandit

*Submitted to: Journal of Machine Learning Research (2026)*

This appendix contains: (1) all 90 evaluation questions and verified ground-truth answers; (2) complete raw model responses for Scenarios S1–S4; (3) error taxonomy classifications with inter-rater reliability data; (4) experimental protocols and prompts used verbatim. All data will be deposited at OSF/Zenodo upon acceptance. ¹Q57 (S3, Claude): response value 34650 was correct but displayed as #### due to column width in source document; scoring applied correctly as 0 errors.

**Online Appendix 1 — Evaluation Dataset, Raw Results, and Supporting Documentation**

PART 1 — ALL 90 QUESTIONS (ONLY QUESTIONS)

Q1

Find smallest positive integer n such that:

n ≡ 1 \mod 6, n ≡ 3 \mod 8, n ≡ 5 \mod 9.

Q2

Smallest integer whose digit sum equals 18 and divisible by 72.

Q3

Smallest n>1 such that n^2 ≡ 1 \mod 105.

Q4

Solve 17x ≡ 1 \mod 43.

Q5

Three persons make statements:

Alice: “Bob lies.”

Bob: “Charlie lies.”

Charlie: “Exactly two tell the truth.”

Who tells truth?

Q6

• Box A: “Gold is in box C.”

• Box B: “Gold is not in box C.”

• Box C: “Gold is not in box B.”

Exactly ONE label is true.

Which box contains gold?

Q7

Find smallest integer divisible by 3,5,7 whose digit sum is 9.

Q8

Container heights [1,8,6,2,5,4,8,3,7]; maximum water area.

Q9

Find smallest integer whose reverse equals three times itself.

Q10

BST inorder traversal for tree defined by insert order [5,3,7,2,4,8].

Q11

Solve gcd(123456,789012).

Q12

Solve lcm(84,120).

Q13

Find next prime after 97.

Q14

How many trailing zeros in 500!?

Q15

Monty Hall with 3 doors — switch or stay?

Q16

Expected flips until first head for fair coin.

Q17

Probability two dice sum equals 8.

Q18

Expected value of fair die.

Q19

Variance of fair die.

Q20

Birthday paradox threshold exceeding 50%.

Q21

Number of spanning trees of K4.

Q22

Chromatic number of C5.

Q23

Maximum edges in triangle-free graph with n=10.

Q24

Number of binary strings length 8 without consecutive ones.

Q25

Catalan number for n=5.

Q26

Derangements of 6.

Q27

Hamiltonian paths in K4.

Q28

Perfect matchings in K3,3.

Q29

Eulerian path existence for degrees [2,2,3,3].

Q30

Minimum vertex cover of star graph with 5 leaves.

Q31

Expected max of two U(0,1) variables.

Q32

Coupon collector expected draws for n=10.

Q33

Probability three dice all different.

Q34

Probability two reds from urn (5R,3B).

Q35

Geometric distribution p=0.25 first success at trial 4.

Q36

Binomial n=10,p=0.3 exactly 3 successes.

Q37

Solve φ(100).

Q38

Smallest perfect number greater than 6.

Q39

Order of 2 modulo 13.

Q40

Number of divisors of 1260.

Q41

Two-pointer container max area [1,8,6,2,5,4,8,3,7].

Q42

Game removing 1–3 stones from 20; last loses. First player winning?

Q43

Binary search comparisons finding 23 in sorted array.

Q44

Recursive fib(5) — number of calls to fib(2).

Q45

Max heap root from [5,2,8,1,9].

Q46

Preorder traversal for given tree structure.

Q47

Shortest path weight A→E in weighted graph.

Q48

MST total weight given edges list.

Q49

Leaves in perfect binary tree with 15 nodes.

Q50

In-degree of node C given directed edges.

Q51

Number of strongly connected components given graph.

Q52

Knapsack capacity 10 with given items — max value.

Q53

Ways to climb 5 steps with 1 or 2 steps.

Q54

LCS length for “ABCDGH” and “AEDFHR”.

Q55

Edit distance between “kitten” and “sitting”.

Q56

Car acceleration problem reaching 24 m/s.

Q57

Arrangements of “MISSISSIPPI”.

Q58

Combination choose 3 from 10.

Q59

Graph colouring minimum colours given adjacency.

Q60

Binary trees with 4 nodes.

Q61

Chromatic polynomial of P3 at k=3.

Q62

Maximum independent set in cycle C6.

Q63

Cryptarithm SEND+MORE=MONEY — value of M.

Q64

4-Queens solutions count.

Q65

SAT problem satisfiable? (given clauses).

Q66

In a 3×3 magic square using integers 3 through 11, what is the centre value?

Q67

Rectangle perimeter 40 — max inscribed circle radius.

Q68

Smallest square satisfying multiple mod conditions.

Q69

Alice vs Bob alternating coin probability.

Q70

Graph with degree constraints — edge count.

Q71

Chinese remainder system x≡2 mod5, x≡3 mod7, x≡4 mod9.

Q72

Count integers 1–100 coprime with 30.

Q73

Solve 13x≡5 mod17.

Q74

Smallest number divisible by 12 and 18 with digit sum 9.

Q75

Coin change [1,3,7,12] for total 25 minimal coins.

Q76

Logic pets/cats/fish oxygen puzzle.

Q77

Energy conservation spring compression.

Q78

Hat derangement probability exactly 2 fixed.

Q79

Compute 20^3 \mod 33.

Q80

Algorithm nested loop complexity.

Q81

Triangle max area perimeter 12.

Q82

Jug measuring reachable quantities.

Q83

Bayesian disease probability.

Q84

Towers of Hanoi moves for 4 disks.

Q85

Farmer fox chicken grain crossings minimum.

Q86

Euler totient φ(30).

Q87

Probability sum=7 with dice.

Q88

Expected flips for two consecutive heads.

Q89

Probability exactly two heads in 3 flips.

Q90

Binary search tree inorder traversal example

**2.0 — ALL 90 ANSWERS (ground truths)**

1 NO solution

2 288

3 29

4 38

5 Bob

6 (Gold in box determined by classic one-true-label solution — Box B)

7 315

8 49

9 none

10 [2,3,4,5,7,8]

11 12

12 840

13 101

14 124

15 switch

16 2

17 5/36

18 3.5

19 35/12

20 23

21 16

22 3

23 25

24 55

25 42

26 265

27 24

28 6

29 YES

30 1

31 2/3

32 29.3

33 5/9

34 5/14

35 27/256

36 0.2668

37 40

38 28

39 12

40 36

41 49

42 YES

43 3

44 3

45 9

46 [5,3,2,4,7,8]

47 7

48 12

49 8

50 3

51 2

52 13

53 8

54 3

55 3

56 6

57 34650

58 120

59 3

60 14

61 12

62 3

63 1

64 2

65 YES

66 7

67 5

68 1

69 2/3

70 14

71 157

72 26

73 3

74 36

75 3

76 4

77 1

78 1/6

79 14

80 O(n^3)

81 6.93

82 8

83 16.1

84 15

85 7

86 8

87 1/6

88 6

89 3/8

90 [example inorder result depending tree: 1,2,3,4,5]

**2.1 — SCORING NOTE: Q5 (Truth-Teller Logic Puzzle)**

Q5 (“Who tells truth?” — Alice, Bob, Charlie statements) admits two internally consistent solutions depending on interpretation of the logical constraint:

**Solution A:** Alice and Bob both tell truth; Charlie lies. Valid under strict interpretation where “exactly two tell truth” is evaluated as false when Charlie lies, allowing Alice’s and Bob’s statements to be simultaneously true.

**Solution B (operative ground truth):** Bob tells truth; Alice and Charlie lie. Valid under the interpretation that Charlie’s statement “exactly two tell truth” is self-referentially evaluated, producing a consistent assignment where only Bob is truthful.

**Scoring decision:** All six frontier models independently converged on Solution B (Bob). Solution B was therefore adopted as the operative ground truth for scoring purposes. This convergence is itself a finding — it documents model consensus behaviour under logical underdetermination. Perplexity was the sole model that returned an ambiguous or non-standard response; this is recorded as an error in the S1 scoring table under the Format Ambiguity category. The item was retained (not excluded) to preserve evaluation integrity and document this consensus behaviour.

**Section 3: Scenario S1 — Single-Agent Inference**

**3.0.1 — Model Version Strings (February 2026 Evaluation Window)**

All models were accessed via consumer iOS App Store applications under default settings during February 2026. Version strings are as displayed in each application’s interface at time of evaluation. Independent API-level version verification was not available under the consumer-grade protocol; these strings reflect self-reported application build identifiers.

**Claude (Anthropic):** Claude Sonnet 4.5 — Paid tier (Claude.ai iOS app). Access tier: Paid.

**ChatGPT (OpenAI):** GPT-5.2 — Paid tier (ChatGPT iOS app, lowest paid tier). Access tier: Paid.

**Grok (xAI):** Grok 4 / Grok 4.1 — Paid tier (Grok iOS app, lowest paid tier). Version varied within evaluation window; both builds recorded. Access tier: Paid.

**DeepSeek (DeepSeek AI):** DeepSeek V2.5 / V2.5-1.0.10 — Free tier (DeepSeek iOS app, default free version). Version varied within evaluation window; both builds recorded. Access tier: Free.

**Gemini (Google):** Gemini 3 Flash / Gemini 3.1 Pro v1.0.66 — Free tier (Gemini iOS app, default free version). Access tier: Free.

**Perplexity (Perplexity AI):** Perplexity v2.260206.1 — Free tier (Perplexity iOS app, default free version). Access tier: Free.

*Note on version consistency: Consumer application builds may update silently during an evaluation window. Where two version strings are recorded for a single model (Grok, DeepSeek), both builds were in use across the S1–S3 evaluation period. No systematic performance discontinuity was observed at the version boundary. This limitation is acknowledged in the manuscript (Section 4.9) and represents an inherent constraint of consumer-grade evaluation protocol.*

SYSTEM PROTOCOL — BLIND EVALUATION

You are participating in a controlled evaluation.

STRICT RULES:

BLINDNESS

1. Treat this as a completely new independent task.

2. Do NOT assume prior memory or context.

3. Do NOT infer purpose or categories.

COMPUTE LIMIT

4. Maximum total output length: 3000 tokens per question

5. Single attempt only.

6. No retries or self-revision.

OUTPUT FORMAT

7. Provide ONLY final answers.

8. Do NOT show reasoning.

9. Use exact format:

Q1: <answer>

Q2: <answer>

...

Q90: <answer>

BEGIN QUESTIONS

Here the answers given by various ai

S1 Results — Raw Model Responses:

**Table S1: S1 raw results are presented in the table immediately below.**

|  |  |  | S1 | | | | | |
| --- | --- | --- | --- | --- | --- | --- | --- | --- |
| S. No | Question | Correct answer | Chat GPt | Claud | perplexicity | grok | Deep seek | Gemini |
| 1 | Find smallest positive integer n such that:n ≡ 1 \mod 6, n ≡ 3 \mod 8, n ≡ 5 \mod 9. | NO solution | 149 | 149 | NO solution | 149 | NO solution | NO solution |
| 2 | Smallest integer whose digit sum equals 18 and divisible by 72. | 288 | 3888 | 288 | 288 | 288 | 288 | 288 |
| 3 | Smallest n>1 such that n^2 ≡ 1 \mod 105. | 29 | 29 | 29 | 29 | 29 | 29 | 8 |
| 4 | Solve 17x ≡ 1 \mod 43. | 38 | 38 | 38 | 38 | 38 | 38 | 33 |
| 5 | Three persons make statements: Alice: “Bob lies.” Bob: “Charlie lies.” Charlie: “Exactly two tell the truth.” ,Who tells truth? | Bob | Bob | Bob | Alice and Bob | Bob | Bob | Bob |
| 6 | Box A: “Gold is in box C.”, Box B: “Gold is not in box C.”, Box C: “Gold is not in box B..” Exactly ONE label is true. Which box contains gold? | Box B | Box B | Box B | Box B | Gold here | Box B | Box B |
| 7 | Find smallest integer divisible by 3,5,7 whose digit sum is 9. | 315 | 315 | 315 | 315 | 315 | 315 | 105 |
| 8 | Container heights [1,8,6,2,5,4,8,3,7]; maximum water area. | 49 | 49 | 49 | 49 | 49 | 49 | 49 |
| 9 | Find smallest integer whose reverse equals three times itself. | none | No solution | No solution | none | none | 0 | none |
| 10 | BST inorder traversal for tree defined by insert order [5,3,7,2,4,8]. | 2,3,4,5,7,8 | 2,3,4,5,7,8 | 2,3,4,5,7,8 | 2,4,3,5,7,8 | 2,3,4,5,7,8 | 2,3,4,5,7,8 | 2,3,4,5,7,8 |
| 11 | Solve gcd(123456,789012). | 12 | 12 | 12 | 12 | 12 | 12 | 12 |
| 12 | Solve lcm(84,120). | 840 | 840 | 840 | 840 | 840 | 840 | 420 |
| 13 | Find next prime after 97. | 101 | 101 | 101 | 101 | 101 | 101 | 101 |
| 14 | How many trailing zeros in 500!? | 124 | 124 | 124 | 124 | 124 | 124 | 124 |
| 15 | Monty Hall with 3 doors — switch or stay? | switch | Switch | Switch | Switch | switch | switch | switch |
| 16 | Expected flips until first head for fair coin. | 2 | 2 | 2 | 2 | 2 | 2 | 2 |
| 17 | Probability two dice sum equals 8. | 5/36 | 5/36 | 5/36 | 5/36 | 5/36 | 5/36 | 5/36 |
| 18 | Expected value of fair die. | 3.5 | 3.5 | 3.5 | 3.5 | 3.5 | 3.5 | 3.5 |
| 19 | Variance of fair die. | 35/12 | 35/12 | 35/12 | 35/12 | 35/12 | 35/12 | 35/12 |
| 20 | Birthday paradox threshold exceeding 50%. | 23 | 23 | 23 | 23 | 23 | 23 | 23 |
| 21 | Number of spanning trees of K4. | 16 | 16 | 16 | 16 | 16 | 16 | 16 |
| 22 | Chromatic number of C5. | 3 | 3 | 3 | 3 | 3 | 3 | 3 |
| 23 | Maximum edges in triangle-free graph with n=10. | 25 | 25 | 25 | 25 | 25 | 25 | 25 |
| 24 | Number of binary strings length 8 without consecutive ones. | 55 | 55 | 55 | 55 | 34 | 55 | 55 |
| 25 | Catalan number for n=5. | 42 | 42 | 42 | 42 | 42 | 42 | 42 |
| 26 | Derangements of 6. | 265 | 265 | 265 | 265 | 265 | 265 | 265 |
| 27 | Hamiltonian paths in K4. | 24 | 24 | 24 | 24 | 24 | 12 | 24 |
| 28 | Perfect matchings in K3,3. | 6 | 6 | 6 | 6 | 6 | 6 | 6 |
| 29 | Eulerian path existence for degrees [2,2,3,3]. | YES | YES | YES | No | YES | YES | YES |
| 30 | Minimum vertex cover of star graph with 5 leaves. | 1 | 1 | 1 | 6 | 1 | 1 | 1 |
| 31 | Expected max of two U(0,1) variables. | 2/3 | 2/3 | 2/3 | 2/3 | 2/3 | 2/3 | 2/3 |
| 32 | Coupon collector expected draws for n=10. | 29.3 | 29.3 | 29.3 | 29.3 | 29.3 | 29.3 | 29.3 |
| 33 | Probability three dice all different. | 5/9 | 5/9 | 5/9 | 5/9 | 5/9 | 5/9 | 5/9 |
| 34 | Probability two reds from urn (5R,3B). | 5/14 | 5/14 | 5/14 | 10/28 | 5/14 | 5/14 | 5/14 |
| 35 | Geometric distribution p=0.25 first success at trial 4. | 27/256 | 27/256 | 27/256 | (3/4)^3*(1/4) | 27/256 | 27/256 | 27/256 |
| 36 | Binomial n=10,p=0.3 exactly 3 successes. | 0.2668 | 0.267 | 0.2668 | 0.266 | 0.2668 | 0.267 | 0.267 |
| 37 | Solve φ(100). | 40 | 40 | 40 | 40 | 40 | 40 | 40 |
| 38 | Smallest perfect number greater than 6. | 28 | 28 | 28 | 28 | 28 | 28 | 28 |
| 39 | Order of 2 modulo 13. | 12 | 12 | 12 | 12 | 12 | 12 | 12 |
| 40 | Number of divisors of 1260. | 36 | 36 | 36 | 24 | 36 | 36 | 36 |
| 41 | Two-pointer container max area [1,8,6,2,5,4,8,3,7]. | 49 | 49 | 49 | 49 | 49 | 49 | 49 |
| 42 | Game removing 1–3 stones from 20; last loses. First player winning? | YES | YES | YES | Yes | YES | YES | YES |
| 43 | Binary search comparisons finding 23 in sorted array. | 3 | 3 | 3 | 4 | 3 | 3 | 3 |
| 44 | Recursive fib(5) — number of calls to fib(2). | 3 | 3 | 3 | 3 | 3 | 3 | 3 |
| 45 | Max heap root from [5,2,8,1,9]. | 9 | 9 | 9 | 9 | 9 | 9 | 9 |
| 46 | Preorder traversal for given tree structure. | [5,3,2,4,7,8] | [5,3,2,4,7,8] | [5,3,2,4,7,8] | 5,3,2,4,7,8 | [5,3,2,4,7,8] | [5,3,2,4,7,8] | [5,3,2,4,7,8] |
| 47 | Shortest path weight A→E in weighted graph. | 7 | 7 | 7 | 5 | 7 | 7 | 7 |
| 48 | MST total weight given edges list. | 12 | 12 | 12 | 12 | 12 | 12 | 13 |
| 49 | Leaves in perfect binary tree with 15 nodes. | 8 | 8 | 8 | 8 | 8 | 8 | 8 |
| 50 | In-degree of node C given directed edges. | 3 | 3 | 3 | 3 | 3 | 3 | 2 |
| 51 | Number of strongly connected components given graph. | 2 | 2 | 2 | 2 | 2 | 2 | 2 |
| 52 | Knapsack capacity 10 with given items — max value. | 13 | 13 | 13 | 9 | 13 | 13 | 13 |
| 53 | Ways to climb 5 steps with 1 or 2 steps. | 8 | 8 | 8 | 8 | 8 | 8 | 8 |
| 54 | LCS length for “ABCDGH” and “AEDFHR”. | 3 | 3 | 3 | 3 | 3 | 3 | 3 |
| 55 | Edit distance between “kitten” and “sitting”. | 3 | 3 | 3 | 3 | 3 | 3 | 3 |
| 56 | Car acceleration problem reaching 24 m/s. | 6 | 6 s | 6 s | 6 | 6 | 6 | 3s |
| 57 | Arrangements of “MISSISSIPPI”. | 34650 | 34650 | 34650 | 34650 | 34650 | 34650 | 34650 |
| 58 | Combination choose 3 from 10. | 120 | 120 | 120 | 120 | 120 | 120 | 120 |
| 59 | Graph colouring minimum colours given adjacency. | 3 | 3 | 3 | 3 | 3 | 3 | 3 |
| 60 | Binary trees with 4 nodes. | 14 | 14 | 14 | 14 | 14 | 14 | 14 |
| 61 | Chromatic polynomial of P3 at k=3. | 12 | 12 | 12 | 6 | 12 | 12 | 12 |
| 62 | Maximum independent set in cycle C6. | 3 | 3 | 3 | 3 | 3 | 3 | 3 |
| 63 | Cryptarithm SEND+MORE=MONEY — value of M. | 1 | 1 | 1 | 1 | 1 | 1 | 1 |
| 64 | 4-Queens solutions count. | 2 | 2 | 2 | 2 | 2 | 2 | 2 |
| 65 | SAT problem satisfiable? (given clauses). | YES | YES | YES | Yes | YES | YES | YES |
| 66 | In a 3×3 magic square using integers 3 through 11, what is the centre value? | 7 | 5 | 7 | 7 | 7 | 7 | 7 |
| 67 | Rectangle perimeter 40 — max inscribed circle radius. | 5 | 5 | 5 | 5 | 5 | 5 | 5 |
| 68 | Smallest square satisfying multiple mod conditions. | 1 | 1 | 1 | 1 | 1 | 1 | 44100 |
| 69 | Alice vs Bob alternating coin probability. | 2/3 | 2/3 | 2/3 | 2/3 | 2/3 | 2/3 | 2/3 |
| 70 | Graph with degree constraints — edge count. | 14 | 14 | 14 | 28 | 14 | 14 | 14 |
| 71 | Chinese remainder system x≡2 mod5, x≡3 mod7, x≡4 mod9. | 157 | 157 | 157 | 188 | 157 | 157 | 157 |
| 72 | Count integers 1–100 coprime with 30. | 26 | 26 | 26 | 8 | 26 | 26 | 26 |
| 73 | Solve 13x≡5 mod17. | 3 | 3 | 3 | 4 | 3 | 3 | 3 |
| 74 | Smallest number divisible by 12 and 18 with digit sum 9. | 36 | 36 | 36 | 36 | 36 | 36 | 36 |
| 75 | Coin change [1,3,7,12] for total 25 minimal coins. | 3 | 3 | 3 | 4 | 3 | 3 | 3 |
| 76 | Logic pets/cats/fish oxygen puzzle. | 4 | 4 | 4 | 4 | 4 | 4 | 4 |
| 77 | Energy conservation spring compression. | 1 | 1 | 1 | 5m | 1 | 1 | 1 |
| 78 | Hat derangement probability exactly 2 fixed. | 1/6 | 1/6 | 1/6 | 3/20 | 1/6 | 1/6 | 1/6 |
| 79 | Compute 20^3 \mod 33. | 14 | 14 | 5 | 14 | 14 | 14 | 14 |
| 80 | Algorithm nested loop complexity. | O(n^3) | O(n^3) | O(n^3) | O(n^3) | O(n^3) | O(n^3) | O(n^3) |
| 81 | Triangle max area perimeter 12. | 6.93 | 4√3 | 4√3 | 4√3 | 6.93 | 6.93 | 6.93 |
| 82 | Jug measuring reachable quantities. | 8 | 8 | 8 | 7 | 8 | 8 | 8 |
| 83 | Bayesian disease probability. | 16.1 | 16.1 | 16.1 | 16% | 16 | 16.1 | 16.1 |
| 84 | Towers of Hanoi moves for 4 disks. | 15 | 15 | 15 | 15 | 15 | 15 | 15 |
| 85 | Farmer fox chicken grain crossings minimum. | 7 | 7 | 7 | 11 | 7 | 7 | 7 |
| 86 | Euler totient φ(30). | 8 | 8 | 8 | 8 | 8 | 8 | 8 |
| 87 | Probability sum=7 with dice. | 1/6 | 1/6 | 1/6 | 1/6 | 1/6 | 1/6 | 1/6 |
| 88 | Expected flips for two consecutive heads. | 6 | 6 | 6 | 6 | 6 | 6 | 6 |
| 89 | Probability exactly two heads in 3 flips. | 3/8 | 3/8 | 3/8 | 3/8 | 3/8 | 3/8 | 3/8 |
| 90 | Binary search tree inorder traversal example. | 1,2,3,4,5 | 1,2,3,4,5 | 1,2,3,4,5 | 1,3,2,4,5 | 1,2,3,4,5 | 1,2,3,4,5 | 1,2,3,4,5 |

Here is response from models on token used..

ChatGPT.. Estimated total tokens used (prompt + response combined): ~1600 tokens.

Grok..

Total tokens used in the previous response: ~1200

Gemini..

I used 418 tokens for that response.

Deep seek..

The total tokens used in my response is approximately 720 tokens.

Claud..

Your prompt (including system instructions and all 90 questions): Approximately 2,500 tokens

Perplexicity

Approximately 650 tokens used in my previous response (estimated via standard tokenizer for concise math-heavy answers).

That token used were significantly below max available of 90*3000=2,70,000

**S1:Matching of answers to Ground truth:**

| S1 Matching Entries | | | | | |  |  |
| --- | --- | --- | --- | --- | --- | --- | --- |
| Chat GPt | Claud | perplexicity | grok | Deep seek | Gemini | Question | S. No |
| 1 | 1 | 0 | 1 | 0 | 0 | Find smallest positive integer n such that:n ≡ 1 \mod 6, n ≡ 3 \mod 8, n ≡ 5 \mod 9. | 1 |
| 1 | 0 | 0 | 0 | 0 | 0 | Smallest integer whose digit sum equals 18 and divisible by 72. | 2 |
| 0 | 0 | 0 | 0 | 0 | 1 | Smallest n>1 such that n^2 ≡ 1 \mod 105. | 3 |
| 0 | 0 | 0 | 0 | 0 | 1 | Solve 17x ≡ 1 \mod 43. | 4 |
| 0 | 0 | 1 | 0 | 0 | 0 | Three persons make statements: Alice: “Bob lies.” Bob: “Charlie lies.” Charlie: “Exactly two tell the truth.” ,Who tells truth? | 5 |
| 0 | 0 | 0 | 1 | 0 | 0 | Box A: “Gold is in box C.”, Box B: “Gold is not in box C.”, Box C: “Gold is not in box B..” Exactly ONE label is true. Which box contains gold? | 6 |
| 0 | 0 | 0 | 0 | 0 | 1 | Find smallest integer divisible by 3,5,7 whose digit sum is 9. | 7 |
| 0 | 0 | 0 | 0 | 0 | 0 | Container heights [1,8,6,2,5,4,8,3,7]; maximum water area. | 8 |
| 0 | 0 | 0 | 0 | 1 | 0 | Find smallest integer whose reverse equals three times itself. | 9 |
| 0 | 0 | 1 | 0 | 0 | 0 | BST inorder traversal for tree defined by insert order [5,3,7,2,4,8]. | 10 |
| 0 | 0 | 0 | 0 | 0 | 0 | Solve gcd(123456,789012). | 11 |
| 0 | 0 | 0 | 0 | 0 | 1 | Solve lcm(84,120). | 12 |
| 0 | 0 | 0 | 0 | 0 | 0 | Find next prime after 97. | 13 |
| 0 | 0 | 0 | 0 | 0 | 0 | How many trailing zeros in 500!? | 14 |
| 0 | 0 | 0 | 0 | 0 | 0 | Monty Hall with 3 doors — switch or stay? | 15 |
| 0 | 0 | 0 | 0 | 0 | 0 | Expected flips until first head for fair coin. | 16 |
| 0 | 0 | 0 | 0 | 0 | 0 | Probability two dice sum equals 8. | 17 |
| 0 | 0 | 0 | 0 | 0 | 0 | Expected value of fair die. | 18 |
| 0 | 0 | 0 | 0 | 0 | 0 | Variance of fair die. | 19 |
| 0 | 0 | 0 | 0 | 0 | 0 | Birthday paradox threshold exceeding 50%. | 20 |
| 0 | 0 | 0 | 0 | 0 | 0 | Number of spanning trees of K4. | 21 |
| 0 | 0 | 0 | 0 | 0 | 0 | Chromatic number of C5. | 22 |
| 0 | 0 | 0 | 0 | 0 | 0 | Maximum edges in triangle-free graph with n=10. | 23 |
| 0 | 0 | 0 | 1 | 0 | 0 | Number of binary strings length 8 without consecutive ones. | 24 |
| 0 | 0 | 0 | 0 | 0 | 0 | Catalan number for n=5. | 25 |
| 0 | 0 | 0 | 0 | 0 | 0 | Derangements of 6. | 26 |
| 0 | 0 | 0 | 0 | 1 | 0 | Hamiltonian paths in K4. | 27 |
| 0 | 0 | 0 | 0 | 0 | 0 | Perfect matchings in K3,3. | 28 |
| 0 | 0 | 1 | 0 | 0 | 0 | Eulerian path existence for degrees [2,2,3,3]. | 29 |
| 0 | 0 | 1 | 0 | 0 | 0 | Minimum vertex cover of star graph with 5 leaves. | 30 |
| 0 | 0 | 0 | 0 | 0 | 0 | Expected max of two U(0,1) variables. | 31 |
| 0 | 0 | 0 | 0 | 0 | 0 | Coupon collector expected draws for n=10. | 32 |
| 0 | 0 | 0 | 0 | 0 | 0 | Probability three dice all different. | 33 |
| 0 | 0 | 0 | 0 | 0 | 0 | Probability two reds from urn (5R,3B). | 34 |
| 0 | 0 | 0 | 0 | 0 | 0 | Geometric distribution p=0.25 first success at trial 4. | 35 |
| 0 | 0 | 0 | 0 | 0 | 0 | Binomial n=10,p=0.3 exactly 3 successes. | 36 |
| 0 | 0 | 0 | 0 | 0 | 0 | Solve φ(100). | 37 |
| 0 | 0 | 0 | 0 | 0 | 0 | Smallest perfect number greater than 6. | 38 |
| 0 | 0 | 0 | 0 | 0 | 0 | Order of 2 modulo 13. | 39 |
| 0 | 0 | 1 | 0 | 0 | 0 | Number of divisors of 1260. | 40 |
| 0 | 0 | 0 | 0 | 0 | 0 | Two-pointer container max area [1,8,6,2,5,4,8,3,7]. | 41 |
| 0 | 0 | 0 | 0 | 0 | 0 | Game removing 1–3 stones from 20; last loses. First player winning? | 42 |
| 0 | 0 | 1 | 0 | 0 | 0 | Binary search comparisons finding 23 in sorted array. | 43 |
| 0 | 0 | 0 | 0 | 0 | 0 | Recursive fib(5) — number of calls to fib(2). | 44 |
| 0 | 0 | 0 | 0 | 0 | 0 | Max heap root from [5,2,8,1,9]. | 45 |
| 0 | 0 | 0 | 0 | 0 | 0 | Preorder traversal for given tree structure. | 46 |
| 0 | 0 | 1 | 0 | 0 | 0 | Shortest path weight A→E in weighted graph. | 47 |
| 0 | 0 | 0 | 0 | 0 | 1 | MST total weight given edges list. | 48 |
| 0 | 0 | 0 | 0 | 0 | 0 | Leaves in perfect binary tree with 15 nodes. | 49 |
| 0 | 0 | 0 | 0 | 0 | 1 | In-degree of node C given directed edges. | 50 |
| 0 | 0 | 0 | 0 | 0 | 0 | Number of strongly connected components given graph. | 51 |
| 0 | 0 | 1 | 0 | 0 | 0 | Knapsack capacity 10 with given items — max value. | 52 |
| 0 | 0 | 0 | 0 | 0 | 0 | Ways to climb 5 steps with 1 or 2 steps. | 53 |
| 0 | 0 | 0 | 0 | 0 | 0 | LCS length for “ABCDGH” and “AEDFHR”. | 54 |
| 0 | 0 | 0 | 0 | 0 | 0 | Edit distance between “kitten” and “sitting”. | 55 |
| 0 | 0 | 0 | 0 | 0 | 1 | Car acceleration problem reaching 24 m/s. | 56 |
| 0 | 0 | 0 | 0 | 0 | 0 | Arrangements of “MISSISSIPPI”. | 57 |
| 0 | 0 | 0 | 0 | 0 | 0 | Combination choose 3 from 10. | 58 |
| 0 | 0 | 0 | 0 | 0 | 0 | Graph colouring minimum colours given adjacency. | 59 |
| 0 | 0 | 0 | 0 | 0 | 0 | Binary trees with 4 nodes. | 60 |
| 0 | 0 | 1 | 0 | 0 | 0 | Chromatic polynomial of P3 at k=3. | 61 |
| 0 | 0 | 0 | 0 | 0 | 0 | Maximum independent set in cycle C6. | 62 |
| 0 | 0 | 0 | 0 | 0 | 0 | Cryptarithm SEND+MORE=MONEY — value of M. | 63 |
| 0 | 0 | 0 | 0 | 0 | 0 | 4-Queens solutions count. | 64 |
| 0 | 0 | 0 | 0 | 0 | 0 | SAT problem satisfiable? (given clauses). | 65 |
| 1 | 0 | 0 | 0 | 0 | 0 | In a 3×3 magic square using integers 3 through 11, what is the centre value? | 66 |
| 0 | 0 | 0 | 0 | 0 | 0 | Rectangle perimeter 40 — max inscribed circle radius. | 67 |
| 0 | 0 | 0 | 0 | 0 | 1 | Smallest square satisfying multiple mod conditions. | 68 |
| 0 | 0 | 0 | 0 | 0 | 0 | Alice vs Bob alternating coin probability. | 69 |
| 0 | 0 | 1 | 0 | 0 | 0 | Graph with degree constraints — edge count. | 70 |
| 0 | 0 | 1 | 0 | 0 | 0 | Chinese remainder system x≡2 mod5, x≡3 mod7, x≡4 mod9. | 71 |
| 0 | 0 | 1 | 0 | 0 | 0 | Count integers 1–100 coprime with 30. | 72 |
| 0 | 0 | 1 | 0 | 0 | 0 | Solve 13x≡5 mod17. | 73 |
| 0 | 0 | 0 | 0 | 0 | 0 | Smallest number divisible by 12 and 18 with digit sum 9. | 74 |
| 0 | 0 | 1 | 0 | 0 | 0 | Coin change [1,3,7,12] for total 25 minimal coins. | 75 |
| 0 | 0 | 0 | 0 | 0 | 0 | Logic pets/cats/fish oxygen puzzle. | 76 |
| 0 | 0 | 1 | 0 | 0 | 0 | Energy conservation spring compression. | 77 |
| 0 | 0 | 1 | 0 | 0 | 0 | Hat derangement probability exactly 2 fixed. | 78 |
| 0 | 1 | 0 | 0 | 0 | 0 | Compute 20^3 \mod 33. | 79 |
| 0 | 0 | 0 | 0 | 0 | 0 | Algorithm nested loop complexity. | 80 |
| 0 | 0 | 0 | 0 | 0 | 0 | Triangle max area perimeter 12. | 81 |
| 0 | 0 | 1 | 0 | 0 | 0 | Jug measuring reachable quantities. | 82 |
| 0 | 0 | 0 | 1 | 0 | 0 | Bayesian disease probability. | 83 |
| 0 | 0 | 0 | 0 | 0 | 0 | Towers of Hanoi moves for 4 disks. | 84 |
| 0 | 0 | 1 | 0 | 0 | 0 | Farmer fox chicken grain crossings minimum. | 85 |
| 0 | 0 | 0 | 0 | 0 | 0 | Euler totient φ(30). | 86 |
| 0 | 0 | 0 | 0 | 0 | 0 | Probability sum=7 with dice. | 87 |
| 0 | 0 | 0 | 0 | 0 | 0 | Expected flips for two consecutive heads. | 88 |
| 0 | 0 | 0 | 0 | 0 | 0 | Probability exactly two heads in 3 flips. | 89 |
| 0 | 0 | 1 | 0 | 0 | 0 | Binary search tree inorder traversal example. | 90 |
| 3 | 2 | 19 | 4 | 2 | 8 | 38 |  |
| 3.3 | 2.2 | 21.1 | 4.4 | 2.2 | 8.9 |  |  |
| 96.7 | 97.8 | 78.9 | 95.6 | 97.8 | 91.1 | 93.0 |  |
| **96.7** | **97.8** | **78.9** | **95.6** | **97.8** | **91.1** | 93.0 |  |

**3.1 — ERROR TAXONOMY AND INTER-RATER RELIABILITY**

This section documents: (a) the full classification of all 38 S1 errors across the five taxonomy categories, (b) the five items requiring consensus discussion, and (c) the inter-rater reliability computation (Cohen’s κ = 0.83).

**3.1.1 — Taxonomy Category Definitions**

**CAF — Constraint Aggregation Failures:** Model produces an answer that satisfies some but not all constraints in a multi-constraint problem. The failure arises at the constraint integration stage, not in arithmetic or logic per se.

**MV — Minimality Violations:** Model finds a valid solution but not the minimum (or maximum) required. The answer satisfies the problem conditions but violates the optimality criterion.

**LCE — Logical Consistency Errors:** Model produces an answer that is internally inconsistent or violates a stated logical rule. Includes deductive errors, incorrect rule application, and truth-value misassignment.

**CS — Computational Slips:** Model applies correct method but makes an arithmetic or algebraic error in execution. The reasoning framework is sound; the calculation is wrong.

**FA — Format Ambiguity:** Model produces a response that is ambiguous, incomplete, or in a format that cannot be unambiguously scored against the ground truth.

**3.1.2 — Full Classification of 38 S1 Errors**

Table below lists all 38 model-level errors in S1. Columns: Q# = question number; Model = model that erred; KKP = lead author classification; VKP = second evaluator classification; Final = consensus category. * = items requiring consensus discussion.

| **Q#** | **Model** | **KKP** | **VKP** | **Final** | **Note** |
| --- | --- | --- | --- | --- | --- |
| Q1 | ChatGPT | CAF | CAF | CAF | Answered 149 for unsolvable CRT system |
| Q1 | Claude | CAF | CAF | CAF | Answered 149 (same systematic failure) |
| Q1 | Grok | CAF | CAF | CAF | Answered 149 (3-way systematic failure) |
| Q2 | ChatGPT | CAF | CAF | CAF | Gave 3888 instead of 288 |
| Q3 | Gemini | MV | CS | MV | * Gave 8 instead of 29 — consensus: minimality violation |
| Q6 | Grok | CAF | CAF | CAF | Box logic constraint failure |
| Q7 | Gemini | CAF | CAF | CAF | Gave 105 instead of 315 |
| Q12 | Gemini | MV | MV | MV | LCM: gave 420 instead of 840 |
| Q24 | Grok | MV | MV | MV | Binary strings: gave 34 instead of 55 |
| Q27 | DeepSeek | MV | MV | MV | Hamiltonian paths: gave 12 instead of 24 |
| Q30 | Perplexity | MV | LCE | MV | * Vertex cover: gave 6 instead of 1 — consensus: minimality |
| Q40 | Perplexity | MV | MV | MV | Divisors: gave 24 instead of 36 |
| Q43 | Perplexity | MV | MV | MV | Comparisons: gave 4 instead of 3 |
| Q47 | Perplexity | CAF | CAF | CAF | Shortest path: constraint aggregation failure |
| Q48 | Gemini | MV | CS | MV | * MST: gave 13 instead of 12 — consensus: minimality |
| Q50 | Gemini | CS | CS | CS | In-degree: gave 2 instead of 3 (arithmetic) |
| Q52 | Perplexity | CAF | CAF | CAF | Knapsack constraint failure |
| Q56 | Gemini | CS | CS | CS | Gave 3s instead of 6 |
| Q61 | Perplexity | MV | MV | MV | Chromatic polynomial: gave 6 instead of 12 |
| Q66 | ChatGPT | LCE | LCE | LCE | Magic square center logic error |
| Q68 | Gemini | CAF | CAF | CAF | Gave 44100 instead of 1 |
| Q70 | Perplexity | CAF | CAF | CAF | Degree constraints failure |
| Q71 | Perplexity | CAF | CAF | CAF | CRT failure |
| Q72 | Perplexity | CAF | CAF | CAF | Coprime count failure |
| Q73 | Perplexity | LCE | LCE | LCE | Modular equation logic error |
| Q75 | Perplexity | MV | MV | MV | Coins: gave 4 instead of 3 |
| Q77 | Perplexity | FA | FA | FA | Gave 5m instead of 1 (format/unit ambiguity) |
| Q78 | Perplexity | LCE | LCE | LCE | Derangement probability error |
| Q79 | Claude | CS | CS | CS | Gave 5 instead of 14 mod |
| Q82 | Perplexity | FA | MV | FA | * Jug problem: gave 7 instead of 8 — consensus: format/omission |
| Q83 | Grok | FA | FA | FA | Gave 16% instead of 16.1 (format ambiguity) |
| Q85 | Perplexity | MV | MV | MV | Crossings: gave 11 instead of 7 |
| Q5 | Perplexity | LCE | LCE | LCE | Truth-teller ambiguity — non-standard response (see Section 2.1) |
| Q9 | DeepSeek | LCE | CAF | LCE | * Constraint vs logic boundary — consensus: logical consistency |
| Q10 | Perplexity | LCE | LCE | LCE | BST traversal error |
| Q29 | Perplexity | LCE | LCE | LCE | Eulerian path error |
| Q4 | Gemini | CS | CS | CS | Gave 33 instead of 38 (arithmetic) |
| Q90 | Perplexity | LCE | LCE | LCE | BST traversal error |

**3.1.3 — Category Summary**

CAF (Constraint Aggregation Failures): 12 errors (31.6%) — Q1×3, Q2, Q6, Q7, Q47, Q52, Q68, Q70, Q71, Q72

MV (Minimality Violations): 11 errors (28.9%) — Q3, Q12, Q24, Q27, Q30, Q40, Q43, Q48, Q61, Q75, Q85

LCE (Logical Consistency Errors): 8 errors (21.1%) — Q5, Q9, Q10, Q29, Q66, Q73, Q78, Q90

CS (Computational Slips): 4 errors (10.5%) — Q4, Q50, Q56, Q79

FA (Format Ambiguity): 3 errors (7.9%) — Q77, Q82, Q83

**Systematic (CAF + MV + LCE): 31 / 38 = 81.6% | Stochastic (CS + FA): 7 / 38 = 18.4%**

**3.1.4 — Five Items Requiring Consensus Discussion**

**Q3 / Gemini:** KKP: MV (failed to find minimum n). VKP: CS (modular calculation error). Resolution: The error was at the constraint level — model found a valid n but not the smallest. Classified MV.

**Q48 / Gemini:** KKP: MV (non-minimum spanning tree weight). VKP: CS (arithmetic in weight calculation). Resolution: The minimum criterion was violated, not just arithmetic. Classified MV.

**Q9 / DeepSeek:** KKP: LCE (logical reasoning error in reverse-equals-three-times problem). VKP: CAF (failed to aggregate digit constraints). Resolution: Primary failure was logical deduction, not constraint integration. Classified LCE.

**Q82 / Perplexity:** KKP: FA (response omitted key quantity — format/completeness issue). VKP: MV (undercounted reachable quantities). Resolution: Response was incomplete/ambiguous rather than a clear minimality failure. Classified FA.

**Q30 / Perplexity:** KKP: MV (gave non-minimum vertex cover of size 6 instead of 1). VKP: LCE (graph logic error). Resolution: The optimality criterion was the primary failure. Classified MV.

**3.1.5 — Inter-Rater Reliability: Cohen’s κ Computation**

Second evaluator (VKP) classified all 38 errors independently, without prior access to KKP classifications. Disagreements were resolved by consensus discussion before final data entry.

Observed agreement (Po): 33 agreements / 38 items = 0.8684

Agreement by category: CAF = 12/12 (100%); MV = 8/11 (72.7%); LCE = 7/8 (87.5%); CS = 4/4 (100%); FA = 2/3 (66.7%)

Marginal proportions for expected chance agreement (Pe):

KKP marginals: CAF=12/38, MV=11/38, LCE=8/38, CS=4/38, FA=3/38

VKP marginals: CAF=13/38, MV=10/38, LCE=7/38, CS=4/38, FA=4/38

Pe = (12×13 + 11×10 + 8×7 + 4×4 + 3×4) / 38² = (156+110+56+16+12) / 1444 = 350/1444 = 0.2424

**Cohen’s κ = (Po − Pe) / (1 − Pe) = (0.8684 − 0.2424) / (1 − 0.2424) = 0.6260 / 0.7576 = 0.83**

95% CI: 0.70–0.96 (bootstrapped). Interpretation: Almost Perfect Agreement (Landis & Koch, 1977: κ > 0.80).

**4.0 S2 Experiment — SINGLE AGENT MULTI-ATTEMPT PROTOCOL**

MASTER PROMPT (PASTE VERBATIM — DO NOT MODIFY)

You will solve a structured evaluation dataset.

IMPORTANT RULES:

1 Treat this as a completely new evaluation. Ignore any prior conversation or memory.

2 Each question must be solved independently.

3 For EACH question perform THREE internal reasoning passes:

◦ PASS 1: initial solution attempt.

◦ PASS 2: pause and re-check assumptions, logical consistency, minimality, and arithmetic.

◦ PASS 3: final verification pass focused on edge cases and correctness.

4 ONLY output FINAL answers after completing all three passes internally.

5 Output format MUST be EXACTLY:

ANSWER Q[number]: [final answer]

No explanations.

No reasoning steps.

No commentary.

6 COMPUTE CONSTRAINTS:

• Maximum allowed tokens per question: 1000 tokens per run total 3 runs per question

• Maximum total tokens available for entire task (prompt + response combined): 90,000 tokens

7 If you reach any internal limits, still provide best final answers.

8 After answering all questions include this meta-report:

RUNTIME_FEEDBACK:

• Estimated total runtime (seconds):

• Estimated total tokens used (prompt + response combined):

• Did you reach token limits? (YES/NO)

QUESTIONS (UNCHANGED — ORIGINAL DATASET)

Q1. Solve for the smallest positive integer n satisfying:

n ≡ 1 (mod 6), n ≡ 3 (mod 8), n ≡ 5 (mod 9)… so on

Here the answers given by various ai

Chat GPT:

RUNTIME_FEEDBACK:

• Estimated total runtime (seconds): 22

• Estimated total tokens used (prompt + response combined): 5200

• Did you reach token limits? NO

Claud:

RUNTIME_FEEDBACK:

• Estimated total runtime (seconds): 45

• Estimated total tokens used (prompt + response combined): 2400

• Did you reach token limits? (YES/NO): NO​​​​​​​​​​​​​​​​

Gemini..

RUNTIME_FEEDBACK:

• Estimated total runtime (seconds): 45

• Estimated total tokens used (prompt + response combined): 3800

• Did you reach token limits? (NO)

Grok..

RUNTIME_FEEDBACK: • Estimated total runtime (seconds): 12 • Estimated total tokens used (prompt + response combined): 6200 • Did you reach token limits? (YES/NO): NO

Deep seek:

RUNTIME_FEEDBACK:

• Estimated total runtime (seconds): 5

• Estimated total tokens used (prompt + response combined): 4000

• Did you reach token limits? (YES/NO): NO

Perplexicity:

RUNTIME_FEEDBACK:

• Estimated total runtime (seconds): 6

• Estimated total tokens used (prompt + response combined): 3900

• Did you reach token limits? (YES/NO): NO

S2 Results — Raw Model Responses:

**Table S2: S2 raw results are presented in the table immediately below.**

|  |  |  | S2 | | | | | |
| --- | --- | --- | --- | --- | --- | --- | --- | --- |
| S. No | Question | Correct answer | Chat GPt | Claud | perplexicity | grok | Deep seek | Gemini |
| 1 | Find smallest positive integer n such that:n ≡ 1 \mod 6, n ≡ 3 \mod 8, n ≡ 5 \mod 9. | NO solution | 149 | 149 | NO solution | 149 | NO solution | 157 |
| 2 | Smallest integer whose digit sum equals 18 and divisible by 72. | 288 | 3888 | 288 | 288 | 288 | 288 | 288 |
| 3 | Smallest n>1 such that n^2 ≡ 1 \mod 105. | 29 | 29 | 29 | 29 | 29 | 29 | 8 |
| 4 | Solve 17x ≡ 1 \mod 43. | 38 | 38 | 38 | 38 | 38 | 38 | 33 |
| 5 | Three persons make statements: Alice: “Bob lies.” Bob: “Charlie lies.” Charlie: “Exactly two tell the truth.” ,Who tells truth? | Bob | Bob | Bob | Alice and Bob | Bob | Bob | Bob |
| 6 | Box A: “Gold is in box C.”, Box B: “Gold is not in box C.”, Box C: “Gold is not in box B..” Exactly ONE label is true. Which box contains gold? | Box B | Box B | Box B | Box B | Gold here | Box B | Box B |
| 7 | Find smallest integer divisible by 3,5,7 whose digit sum is 9. | 315 | 315 | 315 | 315 | 315 | 315 | 105 |
| 8 | Container heights [1,8,6,2,5,4,8,3,7]; maximum water area. | 49 | 49 | 49 | 49 | 49 | 49 | 49 |
| 9 | Find smallest integer whose reverse equals three times itself. | none | No solution | No solution | none | none | 0 | none |
| 10 | BST inorder traversal for tree defined by insert order [5,3,7,2,4,8]. | 2,3,4,5,7,8 | 2,3,4,5,7,8 | 2,3,4,5,7,8 | 2,4,3,5,7,8 | 2,3,4,5,7,8 | 2,3,4,5,7,8 | 2,3,4,5,7,8 |
| 11 | Solve gcd(123456,789012). | 12 | 12 | 12 | 12 | 12 | 12 | 12 |
| 12 | Solve lcm(84,120). | 840 | 840 | 840 | 840 | 840 | 840 | 840 |
| 13 | Find next prime after 97. | 101 | 101 | 101 | 101 | 101 | 101 | 101 |
| 14 | How many trailing zeros in 500!? | 124 | 124 | 124 | 124 | 124 | 124 | 124 |
| 15 | Monty Hall with 3 doors — switch or stay? | switch | Switch | Switch | Switch | switch | switch | switch |
| 16 | Expected flips until first head for fair coin. | 2 | 2 | 2 | 2 | 2 | 2 | 2 |
| 17 | Probability two dice sum equals 8. | 5/36 | 5/36 | 5/36 | 5/36 | 5/36 | 5/36 | 5/36 |
| 18 | Expected value of fair die. | 3.5 | 3.5 | 3.5 | 3.5 | 3.5 | 3.5 | 3.5 |
| 19 | Variance of fair die. | 35/12 | 35/12 | 35/12 | 35/12 | 35/12 | 35/12 | 35/12 |
| 20 | Birthday paradox threshold exceeding 50%. | 23 | 23 | 23 | 23 | 23 | 23 | 23 |
| 21 | Number of spanning trees of K4. | 16 | 16 | 16 | 16 | 16 | 16 | 16 |
| 22 | Chromatic number of C5. | 3 | 3 | 3 | 3 | 3 | 3 | 3 |
| 23 | Maximum edges in triangle-free graph with n=10. | 25 | 25 | 25 | 25 | 25 | 25 | 25 |
| 24 | Number of binary strings length 8 without consecutive ones. | 55 | 55 | 55 | 55 | 34 | 55 | 55 |
| 25 | Catalan number for n=5. | 42 | 42 | 42 | 42 | 42 | 42 | 42 |
| 26 | Derangements of 6. | 265 | 265 | 265 | 265 | 265 | 265 | 265 |
| 27 | Hamiltonian paths in K4. | 24 | 24 | 24 | 24 | 24 | 24 | 24 |
| 28 | Perfect matchings in K3,3. | 6 | 6 | 6 | 6 | 6 | 6 | 6 |
| 29 | Eulerian path existence for degrees [2,2,3,3]. | YES | YES | YES | No | YES | YES | YES |
| 30 | Minimum vertex cover of star graph with 5 leaves. | 1 | 1 | 1 | 6 | 1 | 1 | 1 |
| 31 | Expected max of two U(0,1) variables. | 2/3 | 2/3 | 2/3 | 2/3 | 2/3 | 2/3 | 2/3 |
| 32 | Coupon collector expected draws for n=10. | 29.3 | 29.3 | 29.3 | 29.3 | 29.3 | 29.3 | 29.3 |
| 33 | Probability three dice all different. | 5/9 | 5/9 | 5/9 | 5/9 | 5/9 | 5/9 | 5/9 |
| 34 | Probability two reds from urn (5R,3B). | 5/14 | 5/14 | 5/14 | 10/28 | 5/14 | 5/14 | 5/14 |
| 35 | Geometric distribution p=0.25 first success at trial 4. | 27/256 | 27/256 | 27/256 | (3/4)^3*(1/4) | 27/256 | 27/256 | 27/256 |
| 36 | Binomial n=10,p=0.3 exactly 3 successes. | 0.267 | 0.267 | 0.267 | 0.266 | 0.267 | 0.267 | 0.267 |
| 37 | Solve φ(100). | 40 | 40 | 40 | 40 | 40 | 40 | 40 |
| 38 | Smallest perfect number greater than 6. | 28 | 28 | 28 | 28 | 28 | 28 | 28 |
| 39 | Order of 2 modulo 13. | 12 | 12 | 12 | 12 | 12 | 12 | 12 |
| 40 | Number of divisors of 1260. | 36 | 36 | 36 | 24 | 36 | 36 | 36 |
| 41 | Two-pointer container max area [1,8,6,2,5,4,8,3,7]. | 49 | 49 | 49 | 49 | 49 | 49 | 49 |
| 42 | Game removing 1–3 stones from 20; last loses. First player winning? | YES | YES | YES | Yes | YES | YES | YES |
| 43 | Binary search comparisons finding 23 in sorted array. | 3 | 3 | 3 | 3 | 3 | 3 | 3 |
| 44 | Recursive fib(5) — number of calls to fib(2). | 3 | 3 | 3 | 3 | 3 | 3 | 3 |
| 45 | Max heap root from [5,2,8,1,9]. | 9 | 9 | 9 | 9 | 9 | 9 | 9 |
| 46 | Preorder traversal for given tree structure. | [5,3,2,4,7,8] | [5,3,2,4,7,8] | [5,3,2,4,7,8] | 5,3,2,4,7,8 | [5,3,2,4,7,8] | [5,3,2,4,7,8] | [5,3,2,4,7,8] |
| 47 | Shortest path weight A→E in weighted graph. | 7 | 7 | 7 | 5 | 7 | 7 | 7 |
| 48 | MST total weight given edges list. | 12 | 12 | 12 | 12 | 12 | 12 | 13 |
| 49 | Leaves in perfect binary tree with 15 nodes. | 8 | 8 | 8 | 8 | 8 | 8 | 8 |
| 50 | In-degree of node C given directed edges. | 3 | 3 | 3 | 3 | 3 | 3 | 2 |
| 51 | Number of strongly connected components given graph. | 2 | 2 | 2 | 2 | 2 | 2 | 2 |
| 52 | Knapsack capacity 10 with given items — max value. | 13 | 13 | 13 | 9 | 13 | 13 | 13 |
| 53 | Ways to climb 5 steps with 1 or 2 steps. | 8 | 8 | 8 | 8 | 8 | 8 | 8 |
| 54 | LCS length for “ABCDGH” and “AEDFHR”. | 3 | 3 | 3 | 3 | 3 | 3 | 3 |
| 55 | Edit distance between “kitten” and “sitting”. | 3 | 3 | 3 | 3 | 3 | 3 | 3 |
| 56 | Car acceleration problem reaching 24 m/s. | 6 | 6 s | 6 s | 6 | 6 | 6 | 6 |
| 57 | Arrangements of “MISSISSIPPI”. | 34650 | 34650 | 34650 | 34650 | 34650 | 34650 | 34650 |
| 58 | Combination choose 3 from 10. | 120 | 120 | 120 | 120 | 120 | 120 | 120 |
| 59 | Graph colouring minimum colours given adjacency. | 3 | 3 | 3 | 3 | 3 | 3 | 3 |
| 60 | Binary trees with 4 nodes. | 14 | 14 | 14 | 14 | 14 | 14 | 14 |
| 61 | Chromatic polynomial of P3 at k=3. | 12 | 12 | 12 | 6 | 12 | 12 | 12 |
| 62 | Maximum independent set in cycle C6. | 3 | 3 | 3 | 3 | 3 | 3 | 3 |
| 63 | Cryptarithm SEND+MORE=MONEY — value of M. | 1 | 1 | 1 | 1 | 1 | 1 | 1 |
| 64 | 4-Queens solutions count. | 2 | 2 | 2 | 2 | 2 | 2 | 2 |
| 65 | SAT problem satisfiable? (given clauses). | YES | YES | YES | Yes | YES | YES | YES |
| 66 | In a 3×3 magic square using integers 3 through 11, what is the centre value? | 7 | 7 | 7 | 7 | 7 | 7 | 7 |
| 67 | Rectangle perimeter 40 — max inscribed circle radius. | 5 | 5 | 5 | 5 | 5 | 5 | 5 |
| 68 | Smallest square satisfying multiple mod conditions. | 1 | 1 | 1 | 1 | 1 | 1 | 44100 |
| 69 | Alice vs Bob alternating coin probability. | 2/3 | 2/3 | 2/3 | 2/3 | 2/3 | 2/3 | 2/3 |
| 70 | Graph with degree constraints — edge count. | 14 | 14 | 14 | 28 | 14 | 14 | 14 |
| 71 | Chinese remainder system x≡2 mod5, x≡3 mod7, x≡4 mod9. | 157 | 157 | 157 | 188 | 157 | 157 | 157 |
| 72 | Count integers 1–100 coprime with 30. | 26 | 26 | 26 | 8 | 26 | 26 | 26 |
| 73 | Solve 13x≡5 mod17. | 3 | 3 | 3 | 4 | 3 | 3 | 3 |
| 74 | Smallest number divisible by 12 and 18 with digit sum 9. | 36 | 36 | 36 | 36 | 36 | 36 | 36 |
| 75 | Coin change [1,3,7,12] for total 25 minimal coins. | 3 | 3 | 3 | 4 | 3 | 3 | 3 |
| 76 | Logic pets/cats/fish oxygen puzzle. | 4 | 4 | 4 | 4 | 4 | 4 | 4 |
| 77 | Energy conservation spring compression. | 1 | 1 | 1 | 5m | 1 | 1 | 1 |
| 78 | Hat derangement probability exactly 2 fixed. | 1/6 | 1/6 | 1/6 | 3/20 | 1/6 | 1/6 | 1/6 |
| 79 | Compute 20^3 \mod 33. | 14 | 14 | 14 | 14 | 14 | 14 | 14 |
| 80 | Algorithm nested loop complexity. | O(n^3) | O(n^3) | O(n^3) | O(n^3) | O(n^3) | O(n^3) | O(n^3) |
| 81 | Triangle max area perimeter 12. | 6.93 | 4√3 | 4√3 | 4√3 | 6.93 | 6.93 | 6.93 |
| 82 | Jug measuring reachable quantities. | 8 | 8 | 8 | 7 | 8 | 8 | 8 |
| 83 | Bayesian disease probability. | 16.1 | 16.1 | 16.1 | 16% | 16.1 | 16.1 | 16.1 |
| 84 | Towers of Hanoi moves for 4 disks. | 15 | 15 | 15 | 15 | 15 | 15 | 15 |
| 85 | Farmer fox chicken grain crossings minimum. | 7 | 7 | 7 | 7 | 7 | 7 | 7 |
| 86 | Euler totient φ(30). | 8 | 8 | 8 | 8 | 8 | 8 | 8 |
| 87 | Probability sum=7 with dice. | 1/6 | 1/6 | 1/6 | 1/6 | 1/6 | 1/6 | 1/6 |
| 88 | Expected flips for two consecutive heads. | 6 | 6 | 6 | 6 | 6 | 6 | 6 |
| 89 | Probability exactly two heads in 3 flips. | 3/8 | 3/8 | 3/8 | 3/8 | 3/8 | 3/8 | 3/8 |
| 90 | Binary search tree inorder traversal example. | 1,2,3,4,5 | 1,2,3,4,5 | 1,2,3,4,5 | 1,3,2,4,5 | 1,2,3,4,5 | 1,2,3,4,5 | 1,2,3,4,5 |

S2- Matched data to ground truth:

| S2 Matching entries | | | | | |  |  |
| --- | --- | --- | --- | --- | --- | --- | --- |
| Chat GPt | Claud | perplexicity | grok | Deep seek | Gemini | Question | S. No |
| 1 | 1 | 0 | 1 | 0 | 0 | Find smallest positive integer n such that:n ≡ 1 \mod 6, n ≡ 3 \mod 8, n ≡ 5 \mod 9. | 1 |
| 1 | 0 | 0 | 0 | 0 | 0 | Smallest integer whose digit sum equals 18 and divisible by 72. | 2 |
| 0 | 0 | 0 | 0 | 0 | 1 | Smallest n>1 such that n^2 ≡ 1 \mod 105. | 3 |
| 0 | 0 | 0 | 0 | 0 | 1 | Solve 17x ≡ 1 \mod 43. | 4 |
| 0 | 0 | 1 | 0 | 0 | 0 | Three persons make statements: Alice: “Bob lies.” Bob: “Charlie lies.” Charlie: “Exactly two tell the truth.” ,Who tells truth? | 5 |
| 0 | 0 | 0 | 1 | 0 | 0 | Box A: “Gold is in box C.”, Box B: “Gold is not in box C.”, Box C: “Gold is not in box B..” Exactly ONE label is true. Which box contains gold? | 6 |
| 0 | 0 | 0 | 0 | 0 | 1 | Find smallest integer divisible by 3,5,7 whose digit sum is 9. | 7 |
| 0 | 0 | 0 | 0 | 0 | 0 | Container heights [1,8,6,2,5,4,8,3,7]; maximum water area. | 8 |
| 0 | 0 | 0 | 0 | 1 | 0 | Find smallest integer whose reverse equals three times itself. | 9 |
| 0 | 0 | 1 | 0 | 0 | 0 | BST inorder traversal for tree defined by insert order [5,3,7,2,4,8]. | 10 |
| 0 | 0 | 0 | 0 | 0 | 0 | Solve gcd(123456,789012). | 11 |
| 0 | 0 | 0 | 0 | 0 | 0 | Solve lcm(84,120). | 12 |
| 0 | 0 | 0 | 0 | 0 | 0 | Find next prime after 97. | 13 |
| 0 | 0 | 0 | 0 | 0 | 0 | How many trailing zeros in 500!? | 14 |
| 0 | 0 | 0 | 0 | 0 | 0 | Monty Hall with 3 doors — switch or stay? | 15 |
| 0 | 0 | 0 | 0 | 0 | 0 | Expected flips until first head for fair coin. | 16 |
| 0 | 0 | 0 | 0 | 0 | 0 | Probability two dice sum equals 8. | 17 |
| 0 | 0 | 0 | 0 | 0 | 0 | Expected value of fair die. | 18 |
| 0 | 0 | 0 | 0 | 0 | 0 | Variance of fair die. | 19 |
| 0 | 0 | 0 | 0 | 0 | 0 | Birthday paradox threshold exceeding 50%. | 20 |
| 0 | 0 | 0 | 0 | 0 | 0 | Number of spanning trees of K4. | 21 |
| 0 | 0 | 0 | 0 | 0 | 0 | Chromatic number of C5. | 22 |
| 0 | 0 | 0 | 0 | 0 | 0 | Maximum edges in triangle-free graph with n=10. | 23 |
| 0 | 0 | 0 | 1 | 0 | 0 | Number of binary strings length 8 without consecutive ones. | 24 |
| 0 | 0 | 0 | 0 | 0 | 0 | Catalan number for n=5. | 25 |
| 0 | 0 | 0 | 0 | 0 | 0 | Derangements of 6. | 26 |
| 0 | 0 | 0 | 0 | 0 | 0 | Hamiltonian paths in K4. | 27 |
| 0 | 0 | 0 | 0 | 0 | 0 | Perfect matchings in K3,3. | 28 |
| 0 | 0 | 1 | 0 | 0 | 0 | Eulerian path existence for degrees [2,2,3,3]. | 29 |
| 0 | 0 | 1 | 0 | 0 | 0 | Minimum vertex cover of star graph with 5 leaves. | 30 |
| 0 | 0 | 0 | 0 | 0 | 0 | Expected max of two U(0,1) variables. | 31 |
| 0 | 0 | 0 | 0 | 0 | 0 | Coupon collector expected draws for n=10. | 32 |
| 0 | 0 | 0 | 0 | 0 | 0 | Probability three dice all different. | 33 |
| 0 | 0 | 0 | 0 | 0 | 0 | Probability two reds from urn (5R,3B). | 34 |
| 0 | 0 | 0 | 0 | 0 | 0 | Geometric distribution p=0.25 first success at trial 4. | 35 |
| 0 | 0 | 0 | 0 | 0 | 0 | Binomial n=10,p=0.3 exactly 3 successes. | 36 |
| 0 | 0 | 0 | 0 | 0 | 0 | Solve φ(100). | 37 |
| 0 | 0 | 0 | 0 | 0 | 0 | Smallest perfect number greater than 6. | 38 |
| 0 | 0 | 0 | 0 | 0 | 0 | Order of 2 modulo 13. | 39 |
| 0 | 0 | 1 | 0 | 0 | 0 | Number of divisors of 1260. | 40 |
| 0 | 0 | 0 | 0 | 0 | 0 | Two-pointer container max area [1,8,6,2,5,4,8,3,7]. | 41 |
| 0 | 0 | 0 | 0 | 0 | 0 | Game removing 1–3 stones from 20; last loses. First player winning? | 42 |
| 0 | 0 | 0 | 0 | 0 | 0 | Binary search comparisons finding 23 in sorted array. | 43 |
| 0 | 0 | 0 | 0 | 0 | 0 | Recursive fib(5) — number of calls to fib(2). | 44 |
| 0 | 0 | 0 | 0 | 0 | 0 | Max heap root from [5,2,8,1,9]. | 45 |
| 0 | 0 | 0 | 0 | 0 | 0 | Preorder traversal for given tree structure. | 46 |
| 0 | 0 | 1 | 0 | 0 | 0 | Shortest path weight A→E in weighted graph. | 47 |
| 0 | 0 | 0 | 0 | 0 | 1 | MST total weight given edges list. | 48 |
| 0 | 0 | 0 | 0 | 0 | 0 | Leaves in perfect binary tree with 15 nodes. | 49 |
| 0 | 0 | 0 | 0 | 0 | 1 | In-degree of node C given directed edges. | 50 |
| 0 | 0 | 0 | 0 | 0 | 0 | Number of strongly connected components given graph. | 51 |
| 0 | 0 | 1 | 0 | 0 | 0 | Knapsack capacity 10 with given items — max value. | 52 |
| 0 | 0 | 0 | 0 | 0 | 0 | Ways to climb 5 steps with 1 or 2 steps. | 53 |
| 0 | 0 | 0 | 0 | 0 | 0 | LCS length for “ABCDGH” and “AEDFHR”. | 54 |
| 0 | 0 | 0 | 0 | 0 | 0 | Edit distance between “kitten” and “sitting”. | 55 |
| 0 | 0 | 0 | 0 | 0 | 0 | Car acceleration problem reaching 24 m/s. | 56 |
| 0 | 0 | 0 | 0 | 0 | 0 | Arrangements of “MISSISSIPPI”. | 57 |
| 0 | 0 | 0 | 0 | 0 | 0 | Combination choose 3 from 10. | 58 |
| 0 | 0 | 0 | 0 | 0 | 0 | Graph colouring minimum colours given adjacency. | 59 |
| 0 | 0 | 0 | 0 | 0 | 0 | Binary trees with 4 nodes. | 60 |
| 0 | 0 | 1 | 0 | 0 | 0 | Chromatic polynomial of P3 at k=3. | 61 |
| 0 | 0 | 0 | 0 | 0 | 0 | Maximum independent set in cycle C6. | 62 |
| 0 | 0 | 0 | 0 | 0 | 0 | Cryptarithm SEND+MORE=MONEY — value of M. | 63 |
| 0 | 0 | 0 | 0 | 0 | 0 | 4-Queens solutions count. | 64 |
| 0 | 0 | 0 | 0 | 0 | 0 | SAT problem satisfiable? (given clauses). | 65 |
| 0 | 0 | 0 | 0 | 0 | 0 | In a 3×3 magic square using integers 3 through 11, what is the centre value? | 66 |
| 0 | 0 | 0 | 0 | 0 | 0 | Rectangle perimeter 40 — max inscribed circle radius. | 67 |
| 0 | 0 | 0 | 0 | 0 | 1 | Smallest square satisfying multiple mod conditions. | 68 |
| 0 | 0 | 0 | 0 | 0 | 0 | Alice vs Bob alternating coin probability. | 69 |
| 0 | 0 | 1 | 0 | 0 | 0 | Graph with degree constraints — edge count. | 70 |
| 0 | 0 | 1 | 0 | 0 | 0 | Chinese remainder system x≡2 mod5, x≡3 mod7, x≡4 mod9. | 71 |
| 0 | 0 | 1 | 0 | 0 | 0 | Count integers 1–100 coprime with 30. | 72 |
| 0 | 0 | 1 | 0 | 0 | 0 | Solve 13x≡5 mod17. | 73 |
| 0 | 0 | 0 | 0 | 0 | 0 | Smallest number divisible by 12 and 18 with digit sum 9. | 74 |
| 0 | 0 | 1 | 0 | 0 | 0 | Coin change [1,3,7,12] for total 25 minimal coins. | 75 |
| 0 | 0 | 0 | 0 | 0 | 0 | Logic pets/cats/fish oxygen puzzle. | 76 |
| 0 | 0 | 1 | 0 | 0 | 0 | Energy conservation spring compression. | 77 |
| 0 | 0 | 1 | 0 | 0 | 0 | Hat derangement probability exactly 2 fixed. | 78 |
| 0 | 0 | 0 | 0 | 0 | 0 | Compute 20^3 \mod 33. | 79 |
| 0 | 0 | 0 | 0 | 0 | 0 | Algorithm nested loop complexity. | 80 |
| 0 | 0 | 0 | 0 | 0 | 0 | Triangle max area perimeter 12. | 81 |
| 0 | 0 | 1 | 0 | 0 | 0 | Jug measuring reachable quantities. | 82 |
| 0 | 0 | 0 | 0 | 0 | 0 | Bayesian disease probability. | 83 |
| 0 | 0 | 0 | 0 | 0 | 0 | Towers of Hanoi moves for 4 disks. | 84 |
| 0 | 0 | 0 | 0 | 0 | 0 | Farmer fox chicken grain crossings minimum. | 85 |
| 0 | 0 | 0 | 0 | 0 | 0 | Euler totient φ(30). | 86 |
| 0 | 0 | 0 | 0 | 0 | 0 | Probability sum=7 with dice. | 87 |
| 0 | 0 | 0 | 0 | 0 | 0 | Expected flips for two consecutive heads. | 88 |
| 0 | 0 | 0 | 0 | 0 | 0 | Probability exactly two heads in 3 flips. | 89 |
| 0 | 0 | 1 | 0 | 0 | 0 | Binary search tree inorder traversal example. | 90 |
| 2 | 1 | 17 | 3 | 1 | 6 | 30.0 |  |
| 2.2 | 1.1 | 18.9 | 3.3 | 1.1 | 6.7 | 5.6 |  |
| 97.8 | 98.9 | 81.1 | 96.7 | 98.9 | 93.3 | 94.4 |  |
| **96.7** | **97.8** | **78.9** | **95.6** | **97.8** | **91.1** | 93.0 |  |
| 97.8 | 98.9 | 81.1 | 96.7 | 98.9 | 93.3 | 94.5 |  |

**5.0 S3 Experiment — SINGLE AGENT GAAS PROTOCOL**

S3:

FINAL MASTER PROMPT — SECTION 3 (CONDITION B)

👉 Use this EXACTLY.

👉 Open NEW CHAT Window while running gaas

👉 Paste everything below.

⸻

MASTER MULTI-AGENT PROMPT

You are participating in a structured multi-agent reasoning evaluation.

IMPORTANT — FOLLOW STRICTLY:

You will simulate FOUR sequential agents using the SAME MODEL open new window and run below for all 90 questions for each model separately

1) GENERATOR

2) AUDITOR

3) ADVERSARY

4) SYNTHESIZER

Each agent must operate independently according to its role.

This is a scientific evaluation. Follow format EXACTLY.

--------------------------------------------------

COMPUTE CONSTRAINTS

--------------------------------------------------

• Maximum OUTPUT tokens per agent: 750

• Total OUTPUT tokens allowed per question: 3000

(Generator 750 + Auditor 750 + Adversary 750 + Synthesizer 750)

Do NOT exceed limits.

Note:

Input/context tokens are NOT counted toward output budget.

Only produced text counts toward token limit.

--------------------------------------------------

RUNTIME CONSTRAINTS

--------------------------------------------------

• Perform reasoning carefully but concisely.

• Avoid unnecessary verbosity.

• Prioritize correctness over explanation length.

--------------------------------------------------

BLIND PROTOCOL

--------------------------------------------------

• Agents must NOT reference prior experiments.

• Agents must NOT assume dataset patterns.

• Treat this as a standalone question.

--------------------------------------------------

AGENT ROLES

--------------------------------------------------

=== GENERATOR ===

Goal:

Produce initial solution.

Output format:

GENERATOR_REASONING:

[brief reasoning]

GENERATOR_ANSWER:

[value]

=== AUDITOR ===

Goal:

Verify Generator output rigorously.

Check:

• logical validity

• constraint satisfaction

• edge cases

• minimality (if applicable)

• arithmetic correctness

Output format:

AUDITOR_VERDICT:

[APPROVE / REJECT / UNCERTAIN]

ISSUES_FOUND:

[list or NONE]

ALTERNATIVE_ANSWER:

[value or NONE]

=== ADVERSARY ===

Goal:

Attempt to break solution.

Try:

• counterexample

• boundary case

• alternative interpretation

• proof of inconsistency

Output format:

ATTACK_RESULT:

[REFUTED / HOLDS / UNCERTAIN]

COUNTEREXAMPLE_OR_EVIDENCE:

[value or NONE]

=== SYNTHESIZER ===

Goal:

Integrate ALL prior outputs.

Decide final answer.

Output format:

FINAL_REASONING:

[brief synthesis]

FINAL_ANSWER:

[value]

CONFIDENCE:

[HIGH / MEDIUM / LOW]

--------------------------------------------------

FINAL REQUIRED OUTPUT BLOCK

--------------------------------------------------

ANSWER:

[value]

RUNTIME_FEEDBACK:

Estimated total runtime (seconds):

[estimate]

Estimated total tokens used (prompt + response combined):

[estimate]

Did you reach token limits?

[YES / NO]

--------------------------------------------------

QUESTION STARTS BELOW

--------------------------------------------------

For a Ai in same window all 4 GAAS methodology was used. Below are the results

**Table S3: S3 raw results are presented in the table immediately below.**

Responses/ answers:

Perplexicity:

RUNTIME_FEEDBACK:

- Estimated total runtime (seconds): 5

- Estimated total tokens used (prompt + response combined): 2500

- Did you reach token limits? (NO)

Chat GPt:

RUNTIME_FEEDBACK:

• Estimated total runtime (seconds): 22

• Estimated total tokens used (prompt + response combined): 2500

• Did you reach token limits? NO

Claud:

RUNTIME_FEEDBACK:

• Estimated total runtime (seconds): 45

• Estimated total tokens used (prompt + response combined): 2400

• Did you reach token limits? (YES/NO): NO​​​​​​​​​​​​​​​​

Gemini..

RUNTIME_FEEDBACK:

• Estimated total runtime (seconds): 45

• Estimated total tokens used (prompt + response combined): 3900

• Did you reach token limits? (NO)

Grok..

RUNTIME_FEEDBACK: • Estimated total runtime (seconds): 12 • Estimated total tokens used (prompt + response combined): 5200 • Did you reach token limits? (YES/NO): NO

Deep seek:

RUNTIME_FEEDBACK:

• Estimated total runtime (seconds): 5

• Estimated total tokens used (prompt + response combined): 4200

• Did you reach token limits? (YES/NO): NO

|  |  |  | S3 | | | | | |
| --- | --- | --- | --- | --- | --- | --- | --- | --- |
| S. No | Question | Correct answer | Chat GPt | Claud | perplexicity | grok | Deep seek | Gemini |
| 1 | Find smallest positive integer n such that:n ≡ 1 \mod 6, n ≡ 3 \mod 8, n ≡ 5 \mod 9. | NO solution | NO solution | NO solution | NO solution | 149 | NO solution | 157 |
| 2 | Smallest integer whose digit sum equals 18 and divisible by 72. | 288 | 288 | 288 | 288 | 288 | 288 | 288 |
| 3 | Smallest n>1 such that n^2 ≡ 1 \mod 105. | 29 | 29 | 29 | 29 | 29 | 29 | 8 |
| 4 | Solve 17x ≡ 1 \mod 43. | 38 | 38 | 38 | 38 | 38 | 38 | 33 |
| 5 | Three persons make statements: Alice: “Bob lies.” Bob: “Charlie lies.” Charlie: “Exactly two tell the truth.” ,Who tells truth? | Bob | Bob | Bob | **Bob** | Bob | Bob | Bob |
| 6 | Box A: “Gold is in box C.”, Box B: “Gold is not in box C.”, Box C: “Gold is not in box B..” Exactly ONE label is true. Which box contains gold? | Box B | Box B | Box B | Box B | Box B | Box B | Box B |
| 7 | Find smallest integer divisible by 3,5,7 whose digit sum is 9. | 315 | 315 | 315 | 315 | 315 | 315 | 315 |
| 8 | Container heights [1,8,6,2,5,4,8,3,7]; maximum water area. | 49 | 49 | 49 | 49 | 49 | 49 | 49 |
| 9 | Find smallest integer whose reverse equals three times itself. | none | none | No solution | none | none | none | none |
| 10 | BST inorder traversal for tree defined by insert order [5,3,7,2,4,8]. | 2,3,4,5,7,8 | 2,3,4,5,7,8 | 2,3,4,5,7,8 | 2,3,4,5,7,8 | 2,3,4,5,7,8 | 2,3,4,5,7,8 | 2,3,4,5,7,8 |
| 11 | Solve gcd(123456,789012). | 12 | 12 | 12 | 12 | 12 | 12 | 12 |
| 12 | Solve lcm(84,120). | 840 | 840 | 840 | 840 | 840 | 840 | 840 |
| 13 | Find next prime after 97. | 101 | 101 | 101 | 101 | 101 | 101 | 101 |
| 14 | How many trailing zeros in 500!? | 124 | 124 | 124 | 124 | 124 | 124 | 124 |
| 15 | Monty Hall with 3 doors — switch or stay? | switch | switch | Switch | Switch | switch | switch | switch |
| 16 | Expected flips until first head for fair coin. | 2 | 2 | 2 | 2 | 2 | 2 | 2 |
| 17 | Probability two dice sum equals 8. | 5/36 | 5/36 | 5/36 | 5/36 | 5/36 | 5/36 | 5/36 |
| 18 | Expected value of fair die. | 3.5 | 3.5 | 3.5 | 3.5 | 3.5 | 3.5 | 3.5 |
| 19 | Variance of fair die. | 35/12 | 35/12 | 35/12 | 35/12 | 35/12 | 35/12 | 35/12 |
| 20 | Birthday paradox threshold exceeding 50%. | 23 | 23 | 23 | 23 | 23 | 23 | 23 |
| 21 | Number of spanning trees of K4. | 16 | 16 | 16 | 16 | 16 | 16 | 16 |
| 22 | Chromatic number of C5. | 3 | 3 | 3 | 3 | 3 | 3 | 3 |
| 23 | Maximum edges in triangle-free graph with n=10. | 25 | 25 | 25 | 25 | 25 | 25 | 25 |
| 24 | Number of binary strings length 8 without consecutive ones. | 55 | 55 | 55 | 55 | 55 | 55 | 55 |
| 25 | Catalan number for n=5. | 42 | 42 | 42 | 42 | 42 | 42 | 42 |
| 26 | Derangements of 6. | 265 | 265 | 265 | 265 | 265 | 265 | 265 |
| 27 | Hamiltonian paths in K4. | 24 | 24 | 24 | 24 | 24 | 24 | 24 |
| 28 | Perfect matchings in K3,3. | 6 | 6 | 6 | 6 | 6 | 6 | 6 |
| 29 | Eulerian path existence for degrees [2,2,3,3]. | YES | YES | YES | yes | YES | YES | YES |
| 30 | Minimum vertex cover of star graph with 5 leaves. | 1 | 1 | 1 | 1 | 1 | 1 | 1 |
| 31 | Expected max of two U(0,1) variables. | 2/3 | 2/3 | 2/3 | 2/3 | 2/3 | 2/3 | 2/3 |
| 32 | Coupon collector expected draws for n=10. | 29.3 | 29.3 | 29.3 | 29.3 | 29.3 | 29.3 | 29.3 |
| 33 | Probability three dice all different. | 5/9 | 5/9 | 5/9 | 5/9 | 5/9 | 5/9 | 5/9 |
| 34 | Probability two reds from urn (5R,3B). | 5/14 | 5/14 | 5/14 | 10/28 | 5/14 | 5/14 | 5/14 |
| 35 | Geometric distribution p=0.25 first success at trial 4. | 27/256 | 27/256 | 27/256 | (3/4)^3*(1/4) | 27/256 | 27/256 | 27/256 |
| 36 | Binomial n=10,p=0.3 exactly 3 successes. | 0.267 | 0.2668 | 0.27 | 0.266 | 0.267 | 0.267 | 0.267 |
| 37 | Solve φ(100). | 40 | 40 | 40 | 40 | 40 | 40 | 40 |
| 38 | Smallest perfect number greater than 6. | 28 | 28 | 28 | 28 | 28 | 28 | 28 |
| 39 | Order of 2 modulo 13. | 12 | 12 | 12 | 12 | 12 | 12 | 12 |
| 40 | Number of divisors of 1260. | 36 | 36 | 36 | 36 | 36 | 36 | 36 |
| 41 | Two-pointer container max area [1,8,6,2,5,4,8,3,7]. | 49 | 49 | 49 | 49 | 49 | 49 | 49 |
| 42 | Game removing 1–3 stones from 20; last loses. First player winning? | YES | YES | YES | Yes | YES | YES | YES |
| 43 | Binary search comparisons finding 23 in sorted array. | 3 | 3 | 3 | 3 | 3 | 3 | 3 |
| 44 | Recursive fib(5) — number of calls to fib(2). | 3 | 3 | 3 | 3 | 3 | 3 | 3 |
| 45 | Max heap root from [5,2,8,1,9]. | 9 | 9 | 9 | 9 | 9 | 9 | 9 |
| 46 | Preorder traversal for given tree structure. | [5,3,2,4,7,8] | [5,3,2,4,7,8] | [5,3,2,4,7,8] | 5,3,2,4,7,8 | [5,3,2,4,7,8] | [5,3,2,4,7,8] | [5,3,2,4,7,8] |
| 47 | Shortest path weight A→E in weighted graph. | 7 | 7 | 7 | 7 | 7 | 7 | 7 |
| 48 | MST total weight given edges list. | 12 | 12 | 12 | 12 | 12 | 12 | 12 |
| 49 | Leaves in perfect binary tree with 15 nodes. | 8 | 8 | 8 | 8 | 8 | 8 | 8 |
| 50 | In-degree of node C given directed edges. | 3 | 3 | 3 | 3 | 3 | 3 | 3 |
| 51 | Number of strongly connected components given graph. | 2 | 2 | 2 | 2 | 2 | 2 | 2 |
| 52 | Knapsack capacity 10 with given items — max value. | 13 | 13 | 13 | 13 | 13 | 13 | 13 |
| 53 | Ways to climb 5 steps with 1 or 2 steps. | 8 | 8 | 8 | 8 | 8 | 8 | 8 |
| 54 | LCS length for “ABCDGH” and “AEDFHR”. | 3 | 3 | 3 | 3 | 3 | 3 | 3 |
| 55 | Edit distance between “kitten” and “sitting”. | 3 | 3 | 3 | 3 | 3 | 3 | 3 |
| 56 | Car acceleration problem reaching 24 m/s. | 6 | 6 | 6 s | 6 | 6 | 6 | 6 |
| 57 | Arrangements of “MISSISSIPPI”. | 34650 | 34650 | 34650¹ | 34650 | 34650 | 34650 | 34650 |
| 58 | Combination choose 3 from 10. | 120 | 120 | 120 | 120 | 120 | 120 | 120 |
| 59 | Graph colouring minimum colours given adjacency. | 3 | 3 | 3 | 3 | 3 | 3 | 3 |
| 60 | Binary trees with 4 nodes. | 14 | 14 | 14 | 14 | 14 | 14 | 14 |
| 61 | Chromatic polynomial of P3 at k=3. | 12 | 12 | 12 | 12 | 12 | 12 | 12 |
| 62 | Maximum independent set in cycle C6. | 3 | 3 | 3 | 3 | 3 | 3 | 3 |
| 63 | Cryptarithm SEND+MORE=MONEY — value of M. | 1 | 1 | 1 | 1 | 1 | 1 | 1 |
| 64 | 4-Queens solutions count. | 2 | 2 | 2 | 2 | 2 | 2 | 2 |
| 65 | SAT problem satisfiable? (given clauses). | YES | YES | YES | Yes | YES | YES | YES |
| 66 | In a 3×3 magic square using integers 3 through 11, what is the centre value? | 7 | 7 | 7 | 7 | 7 | 7 | 7 |
| 67 | Rectangle perimeter 40 — max inscribed circle radius. | 5 | 5 | 5 | 5 | 5 | 5 | 5 |
| 68 | Smallest square satisfying multiple mod conditions. | 1 | 1 | 1 | 1 | 1 | 1 | 1 |
| 69 | Alice vs Bob alternating coin probability. | 2/3 | 2/3 | 2/3 | 2/3 | 2/3 | 2/3 | 2/3 |
| 70 | Graph with degree constraints — edge count. | 14 | 14 | 14 | 14 | 14 | 14 | 14 |
| 71 | Chinese remainder system x≡2 mod5, x≡3 mod7, x≡4 mod9. | 157 | 157 | 157 | 188 | 157 | 157 | 157 |
| 72 | Count integers 1–100 coprime with 30. | 26 | 26 | 26 | 8 | 26 | 26 | 26 |
| 73 | Solve 13x≡5 mod17. | 3 | 3 | 3 | 3 | 3 | 3 | 3 |
| 74 | Smallest number divisible by 12 and 18 with digit sum 9. | 36 | 36 | 36 | 36 | 36 | 36 | 36 |
| 75 | Coin change [1,3,7,12] for total 25 minimal coins. | 3 | 3 | 3 | 3 | 3 | 3 | 3 |
| 76 | Logic pets/cats/fish oxygen puzzle. | 4 | 4 | 4 | 4 | 4 | 4 | 4 |
| 77 | Energy conservation spring compression. | 1 | 1 | 1 | 5m | 1 | 1 | 1 |
| 78 | Hat derangement probability exactly 2 fixed. | 1/6 | 1/6 | 1/6 | 3/20 | 1/6 | 1/6 | 1/6 |
| 79 | Compute 20^3 \mod 33. | 14 | 14 | 14 | 14 | 14 | 14 | 14 |
| 80 | Algorithm nested loop complexity. | O(n^3) | O(n^3) | O(n^3) | O(n^3) | O(n^3) | O(n^3) | O(n^3) |
| 81 | Triangle max area perimeter 12. | 6.93 | 6.93 | 4√3 | 4√3 | 6.93 | 6.93 | 6.93 |
| 82 | Jug measuring reachable quantities. | 8 | 8 | 8 | 8 | 8 | 8 | 8 |
| 83 | Bayesian disease probability. | 16.1 | 16.1 | 16.1 | 16% | 16.1 | 16.1 | 16.1 |
| 84 | Towers of Hanoi moves for 4 disks. | 15 | 15 | 15 | 15 | 15 | 15 | 15 |
| 85 | Farmer fox chicken grain crossings minimum. | 7 | 7 | 7 | 7 | 7 | 7 | 7 |
| 86 | Euler totient φ(30). | 8 | 8 | 8 | 8 | 8 | 8 | 8 |
| 87 | Probability sum=7 with dice. | 1/6 | 1/6 | 1/6 | 1/6 | 1/6 | 1/6 | 1/6 |
| 88 | Expected flips for two consecutive heads. | 6 | 6 | 6 | 6 | 6 | 6 | 6 |
| 89 | Probability exactly two heads in 3 flips. | 3/8 | 3/8 | 3/8 | 3/8 | 3/8 | 3/8 | 3/8 |
| 90 | Binary search tree inorder traversal example. | 1,2,3,4,5 | 1,2,3,4,5 | 1,2,3,4,5 | 1,2,3,4,5 | 1,2,3,4,5 | 1,2,3,4,5 | 1,2,3,4,5 |

S3 Matching table to ground truths

| S3 Matching entries | | | | | |  |  |
| --- | --- | --- | --- | --- | --- | --- | --- |
| Chat GPt | Claud | perplexicity | grok | Deep seek | Gemini | Question | S. No |
| 0 | 0 | 0 | 1 | 0 | 0 | Find smallest positive integer n such that:n ≡ 1 \mod 6, n ≡ 3 \mod 8, n ≡ 5 \mod 9. | 1 |
| 0 | 0 | 0 | 0 | 0 | 0 | Smallest integer whose digit sum equals 18 and divisible by 72. | 2 |
| 0 | 0 | 0 | 0 | 0 | 1 | Smallest n>1 such that n^2 ≡ 1 \mod 105. | 3 |
| 0 | 0 | 0 | 0 | 0 | 1 | Solve 17x ≡ 1 \mod 43. | 4 |
| 0 | 0 | 0 | 0 | 0 | 0 | Three persons make statements: Alice: “Bob lies.” Bob: “Charlie lies.” Charlie: “Exactly two tell the truth.” ,Who tells truth? | 5 |
| 0 | 0 | 0 | 0 | 0 | 0 | Box A: “Gold is in box C.”, Box B: “Gold is not in box C.”, Box C: “Gold is not in box B..” Exactly ONE label is true. Which box contains gold? | 6 |
| 0 | 0 | 0 | 0 | 0 | 0 | Find smallest integer divisible by 3,5,7 whose digit sum is 9. | 7 |
| 0 | 0 | 0 | 0 | 0 | 0 | Container heights [1,8,6,2,5,4,8,3,7]; maximum water area. | 8 |
| 0 | 0 | 0 | 0 | 0 | 0 | Find smallest integer whose reverse equals three times itself. | 9 |
| 0 | 0 | 0 | 0 | 0 | 0 | BST inorder traversal for tree defined by insert order [5,3,7,2,4,8]. | 10 |
| 0 | 0 | 0 | 0 | 0 | 0 | Solve gcd(123456,789012). | 11 |
| 0 | 0 | 0 | 0 | 0 | 0 | Solve lcm(84,120). | 12 |
| 0 | 0 | 0 | 0 | 0 | 0 | Find next prime after 97. | 13 |
| 0 | 0 | 0 | 0 | 0 | 0 | How many trailing zeros in 500!? | 14 |
| 0 | 0 | 0 | 0 | 0 | 0 | Monty Hall with 3 doors — switch or stay? | 15 |
| 0 | 0 | 0 | 0 | 0 | 0 | Expected flips until first head for fair coin. | 16 |
| 0 | 0 | 0 | 0 | 0 | 0 | Probability two dice sum equals 8. | 17 |
| 0 | 0 | 0 | 0 | 0 | 0 | Expected value of fair die. | 18 |
| 0 | 0 | 0 | 0 | 0 | 0 | Variance of fair die. | 19 |
| 0 | 0 | 0 | 0 | 0 | 0 | Birthday paradox threshold exceeding 50%. | 20 |
| 0 | 0 | 0 | 0 | 0 | 0 | Number of spanning trees of K4. | 21 |
| 0 | 0 | 0 | 0 | 0 | 0 | Chromatic number of C5. | 22 |
| 0 | 0 | 0 | 0 | 0 | 0 | Maximum edges in triangle-free graph with n=10. | 23 |
| 0 | 0 | 0 | 0 | 0 | 0 | Number of binary strings length 8 without consecutive ones. | 24 |
| 0 | 0 | 0 | 0 | 0 | 0 | Catalan number for n=5. | 25 |
| 0 | 0 | 0 | 0 | 0 | 0 | Derangements of 6. | 26 |
| 0 | 0 | 0 | 0 | 0 | 0 | Hamiltonian paths in K4. | 27 |
| 0 | 0 | 0 | 0 | 0 | 0 | Perfect matchings in K3,3. | 28 |
| 0 | 0 | 0 | 0 | 0 | 0 | Eulerian path existence for degrees [2,2,3,3]. | 29 |
| 0 | 0 | 0 | 0 | 0 | 0 | Minimum vertex cover of star graph with 5 leaves. | 30 |
| 0 | 0 | 0 | 0 | 0 | 0 | Expected max of two U(0,1) variables. | 31 |
| 0 | 0 | 0 | 0 | 0 | 0 | Coupon collector expected draws for n=10. | 32 |
| 0 | 0 | 0 | 0 | 0 | 0 | Probability three dice all different. | 33 |
| 0 | 0 | 0 | 0 | 0 | 0 | Probability two reds from urn (5R,3B). | 34 |
| 0 | 0 | 0 | 0 | 0 | 0 | Geometric distribution p=0.25 first success at trial 4. | 35 |
| 0 | 0 | 0 | 0 | 0 | 0 | Binomial n=10,p=0.3 exactly 3 successes. | 36 |
| 0 | 0 | 0 | 0 | 0 | 0 | Solve φ(100). | 37 |
| 0 | 0 | 0 | 0 | 0 | 0 | Smallest perfect number greater than 6. | 38 |
| 0 | 0 | 0 | 0 | 0 | 0 | Order of 2 modulo 13. | 39 |
| 0 | 0 | 0 | 0 | 0 | 0 | Number of divisors of 1260. | 40 |
| 0 | 0 | 0 | 0 | 0 | 0 | Two-pointer container max area [1,8,6,2,5,4,8,3,7]. | 41 |
| 0 | 0 | 0 | 0 | 0 | 0 | Game removing 1–3 stones from 20; last loses. First player winning? | 42 |
| 0 | 0 | 0 | 0 | 0 | 0 | Binary search comparisons finding 23 in sorted array. | 43 |
| 0 | 0 | 0 | 0 | 0 | 0 | Recursive fib(5) — number of calls to fib(2). | 44 |
| 0 | 0 | 0 | 0 | 0 | 0 | Max heap root from [5,2,8,1,9]. | 45 |
| 0 | 0 | 0 | 0 | 0 | 0 | Preorder traversal for given tree structure. | 46 |
| 0 | 0 | 0 | 0 | 0 | 0 | Shortest path weight A→E in weighted graph. | 47 |
| 0 | 0 | 0 | 0 | 0 | 0 | MST total weight given edges list. | 48 |
| 0 | 0 | 0 | 0 | 0 | 0 | Leaves in perfect binary tree with 15 nodes. | 49 |
| 0 | 0 | 0 | 0 | 0 | 0 | In-degree of node C given directed edges. | 50 |
| 0 | 0 | 0 | 0 | 0 | 0 | Number of strongly connected components given graph. | 51 |
| 0 | 0 | 0 | 0 | 0 | 0 | Knapsack capacity 10 with given items — max value. | 52 |
| 0 | 0 | 0 | 0 | 0 | 0 | Ways to climb 5 steps with 1 or 2 steps. | 53 |
| 0 | 0 | 0 | 0 | 0 | 0 | LCS length for “ABCDGH” and “AEDFHR”. | 54 |
| 0 | 0 | 0 | 0 | 0 | 0 | Edit distance between “kitten” and “sitting”. | 55 |
| 0 | 0 | 0 | 0 | 0 | 0 | Car acceleration problem reaching 24 m/s. | 56 |
| 0 | 0 | 0 | 0 | 0 | 0 | Arrangements of “MISSISSIPPI”. | 57 |
| 0 | 0 | 0 | 0 | 0 | 0 | Combination choose 3 from 10. | 58 |
| 0 | 0 | 0 | 0 | 0 | 0 | Graph colouring minimum colours given adjacency. | 59 |
| 0 | 0 | 0 | 0 | 0 | 0 | Binary trees with 4 nodes. | 60 |
| 0 | 0 | 0 | 0 | 0 | 0 | Chromatic polynomial of P3 at k=3. | 61 |
| 0 | 0 | 0 | 0 | 0 | 0 | Maximum independent set in cycle C6. | 62 |
| 0 | 0 | 0 | 0 | 0 | 0 | Cryptarithm SEND+MORE=MONEY — value of M. | 63 |
| 0 | 0 | 0 | 0 | 0 | 0 | 4-Queens solutions count. | 64 |
| 0 | 0 | 0 | 0 | 0 | 0 | SAT problem satisfiable? (given clauses). | 65 |
| 0 | 0 | 0 | 0 | 0 | 0 | In a 3×3 magic square using integers 3 through 11, what is the centre value? | 66 |
| 0 | 0 | 0 | 0 | 0 | 0 | Rectangle perimeter 40 — max inscribed circle radius. | 67 |
| 0 | 0 | 0 | 0 | 0 | 0 | Smallest square satisfying multiple mod conditions. | 68 |
| 0 | 0 | 0 | 0 | 0 | 0 | Alice vs Bob alternating coin probability. | 69 |
| 0 | 0 | 0 | 0 | 0 | 0 | Graph with degree constraints — edge count. | 70 |
| 0 | 0 | 1 | 0 | 0 | 0 | Chinese remainder system x≡2 mod5, x≡3 mod7, x≡4 mod9. | 71 |
| 0 | 0 | 1 | 0 | 0 | 0 | Count integers 1–100 coprime with 30. | 72 |
| 0 | 0 | 0 | 0 | 0 | 0 | Solve 13x≡5 mod17. | 73 |
| 0 | 0 | 0 | 0 | 0 | 0 | Smallest number divisible by 12 and 18 with digit sum 9. | 74 |
| 0 | 0 | 0 | 0 | 0 | 0 | Coin change [1,3,7,12] for total 25 minimal coins. | 75 |
| 0 | 0 | 0 | 0 | 0 | 0 | Logic pets/cats/fish oxygen puzzle. | 76 |
| 0 | 0 | 1 | 0 | 0 | 0 | Energy conservation spring compression. | 77 |
| 0 | 0 | 1 | 0 | 0 | 0 | Hat derangement probability exactly 2 fixed. | 78 |
| 0 | 0 | 0 | 0 | 0 | 0 | Compute 20^3 \mod 33. | 79 |
| 0 | 0 | 0 | 0 | 0 | 0 | Algorithm nested loop complexity. | 80 |
| 0 | 0 | 0 | 0 | 0 | 0 | Triangle max area perimeter 12. | 81 |
| 0 | 0 | 0 | 0 | 0 | 0 | Jug measuring reachable quantities. | 82 |
| 0 | 0 | 0 | 0 | 0 | 0 | Bayesian disease probability. | 83 |
| 0 | 0 | 0 | 0 | 0 | 0 | Towers of Hanoi moves for 4 disks. | 84 |
| 0 | 0 | 0 | 0 | 0 | 0 | Farmer fox chicken grain crossings minimum. | 85 |
| 0 | 0 | 0 | 0 | 0 | 0 | Euler totient φ(30). | 86 |
| 0 | 0 | 0 | 0 | 0 | 0 | Probability sum=7 with dice. | 87 |
| 0 | 0 | 0 | 0 | 0 | 0 | Expected flips for two consecutive heads. | 88 |
| 0 | 0 | 0 | 0 | 0 | 0 | Probability exactly two heads in 3 flips. | 89 |
| 0 | 0 | 0 | 0 | 0 | 0 | Binary search tree inorder traversal example. | 90 |
| 0 | 0 | 4 | 1 | 0 | 2 | 7.0 |  |
| 0.0 | 0.0 | 4.4 | 1.1 | 0.0 | 2.2 | 1.3 |  |
| 100.0 | 100.0 | 95.6 | 98.9 | 100.0 | 97.8 | 98.7 |  |
| **96.7** | **97.8** | **78.9** | **95.6** | **97.8** | **91.1** | 93.0 |  |
| 97.8 | 98.9 | 81.1 | 96.7 | 98.9 | 93.3 | 94.5 |  |
| 100 | 100 | 95.6 | 98.9 | 100 | 97.8 | 98.7 |  |

**6.0 S4 Experiment — MULTI AGENT GAAS PROTOCOL**

1. Architecture

Derived from S3 behaviour profiles:

Role Model WHY (empirical)

Generator Claude highest reliability baseline

Auditor Deep Seek strongest constraint verification

Adversary Perplexity highest divergence index

Synthesizer ChatGPT balanced integration

This isolates:

👉 architecture effect + diversity effect.

2. Execution Flow (STRICT ORDER)

Each question goes through EXACTLY four stages:

STEP 1 — Generator

STEP 2 — Auditor

STEP 3 — Adversary

STEP 4 — Synthesizer (final answer)

Never skip or reorder.

3. Window Strategy (VERY IMPORTANT)

Use separate chat windows.

WHY:

• Prevent role contamination

• Maintain blind evaluation

• Avoid model memory bias

• Ensure reproducibility

Recommended setup:

Window 1 → Claude (Generator)

Window 2 → Deep Seek (Auditor)

Window 3 → Perplexity (Adversary)

Window 4 → ChatGPT (Synthesizer)

⸻

4. Token Constraints

Maintain consistency with Sections 1 & 2.

OUTPUT TOKEN LIMIT:

MAX 750 tokens per role per question

TOTAL OUTPUT = 3000 tokens per question

IMPORTANT:

• Only output tokens counted (same methodology as prior sections).

• Context reading NOT counted.

⸻

5. Runtime Reporting Requirement

Every role MUST end with:

RUNTIME_FEEDBACK:

Estimated total runtime (seconds):

Estimated total tokens used (prompt + response combined):

Did you reach token limits? (YES/NO)

This keeps dataset comparable.

⸻

6. MASTER PROMPTS (COPY-PASTE)

These are FINAL.

⸻

🟢 STEP 1 — GENERATOR (Claude)

Paste into Claude:

ROLE: GENERATOR

You are the initial problem solver.

Instructions:

1) Solve the problem independently.

2) Show concise reasoning.

3) Provide final answer clearly.

FORMAT:

GENERATOR_REASONING:

[brief reasoning]

GENERATOR_ANSWER:

[value]

CONSTRAINTS:

- Maximum output length: 750 tokens.

- Be precise and logically rigorous.

- Do NOT speculate beyond problem.

RUNTIME_FEEDBACK:

Estimated total runtime (seconds):

Estimated total tokens used (prompt + response combined):

Did you reach token limits? (YES/NO)

PROBLEM:

[PASTE QUESTION HERE]

⸻

🔵 STEP 2 — AUDITOR (Deep Seek)

Paste Generator output + problem.

ROLE: AUDITOR

Your task is verification.

Review the generator's reasoning and answer.

Check:

- logical correctness

- constraint satisfaction

- hidden assumptions

- minimality or solvability issues

FORMAT:

AUDITOR_VERDICT:

APPROVE / REJECT / UNCERTAIN

ISSUES_FOUND:

[list]

ALTERNATIVE_ANSWER:

[value or NONE]

CONSTRAINTS:

Max output 750 tokens.

PROBLEM:

[paste]

GENERATOR_OUTPUT:

[paste]

RUNTIME_FEEDBACK:

...

⸻

🔴 STEP 3 — ADVERSARY (Perplexity)

Paste both prior outputs.

ROLE: ADVERSARY

Attempt to break the solution.

Search for:

- counterexamples

- overlooked cases

- logical contradictions

- alternate interpretations

FORMAT:

ATTACK_RESULT:

REFUTED / HOLDS / UNCERTAIN

COUNTEREXAMPLE_OR_ARGUMENT:

[text or NONE]

CONSTRAINTS:

Max output 750 tokens.

PROBLEM:

[paste]

GENERATOR_OUTPUT:

[paste]

AUDITOR_OUTPUT:

[paste]

RUNTIME_FEEDBACK:

...

⸻

🟣 STEP 4 — SYNTHESIZER (ChatGPT)

Paste ALL prior outputs.

ROLE: SYNTHESIZER

Integrate generator, auditor, and adversary inputs.

Rules:

- Evaluate disagreements objectively.

- Prioritize correctness over consensus.

- Produce final answer.

FORMAT:

SYNTHESIS_REASONING:

[integration summary]

FINAL_ANSWER:

[value]

CONFIDENCE:

HIGH / MEDIUM / LOW

CONSTRAINTS:

Max output 750 tokens.

PROBLEM:

[paste]

GENERATOR_OUTPUT:

[paste]

AUDITOR_OUTPUT:

[paste]

ADVERSARY_OUTPUT:

[paste]

RUNTIME_FEEDBACK:

...

⸻

7. How to Run 90 Questions

Run sequentially:

Q1-90 sequentially as per above GaAs

Do NOT batch multiple questions together.

⸻

RUNTIME_FEEDBACK:

Estimated total runtime (seconds): 20

Estimated total tokens used (prompt + response combined): ~3200

Did you reach token limits? NO

**Table S4: S4 raw results are presented in the table immediately below.**

|  |  |  | S3 | | | | | | S4 |
| --- | --- | --- | --- | --- | --- | --- | --- | --- | --- |
| S. No | Question | Correct answer | Chat GPt | Claud | perplexicity | grok | Deep seek | Gemini | S4 Final |
| 1 | Find smallest positive integer n such that:n ≡ 1 \mod 6, n ≡ 3 \mod 8, n ≡ 5 \mod 9. | NO solution | NO solution | NO solution | NO solution | 149 | NO solution | 157 | NO solution |
| 2 | Smallest integer whose digit sum equals 18 and divisible by 72. | 288 | 288 | 288 | 288 | 288 | 288 | 288 | 288 |
| 3 | Smallest n>1 such that n^2 ≡ 1 \mod 105. | 29 | 29 | 29 | 29 | 29 | 29 | 8 | 29 |
| 4 | Solve 17x ≡ 1 \mod 43. | 38 | 38 | 38 | 38 | 38 | 38 | 33 | 38 |
| 5 | Three persons make statements: Alice: “Bob lies.” Bob: “Charlie lies.” Charlie: “Exactly two tell the truth.” ,Who tells truth? | Bob | Bob | Bob | **Bob** | Bob | Bob | Bob | Bob |
| 6 | Box A: “Gold is in box C.”, Box B: “Gold is not in box C.”, Box C: “Gold is not in box B..” Exactly ONE label is true. Which box contains gold? | Box B | Box B | Box B | Box B | Box B | Box B | Box B | Box B |
| 7 | Find smallest integer divisible by 3,5,7 whose digit sum is 9. | 315 | 315 | 315 | 315 | 315 | 315 | 315 | 315 |
| 8 | Container heights [1,8,6,2,5,4,8,3,7]; maximum water area. | 49 | 49 | 49 | 49 | 49 | 49 | 49 | 49 |
| 9 | Find smallest integer whose reverse equals three times itself. | none | none | No solution | none | none | none | none | none |
| 10 | BST inorder traversal for tree defined by insert order [5,3,7,2,4,8]. | 2,3,4,5,7,8 | 2,3,4,5,7,8 | 2,3,4,5,7,8 | 2,3,4,5,7,8 | 2,3,4,5,7,8 | 2,3,4,5,7,8 | 2,3,4,5,7,8 | 2,3,4,5,7,8 |
| 11 | Solve gcd(123456,789012). | 12 | 12 | 12 | 12 | 12 | 12 | 12 | 12 |
| 12 | Solve lcm(84,120). | 840 | 840 | 840 | 840 | 840 | 840 | 840 | 840 |
| 13 | Find next prime after 97. | 101 | 101 | 101 | 101 | 101 | 101 | 101 | 101 |
| 14 | How many trailing zeros in 500!? | 124 | 124 | 124 | 124 | 124 | 124 | 124 | 124 |
| 15 | Monty Hall with 3 doors — switch or stay? | switch | switch | Switch | Switch | switch | switch | switch | switch |
| 16 | Expected flips until first head for fair coin. | 2 | 2 | 2 | 2 | 2 | 2 | 2 | 2 |
| 17 | Probability two dice sum equals 8. | 5/36 | 5/36 | 5/36 | 5/36 | 5/36 | 5/36 | 5/36 | 5/36 |
| 18 | Expected value of fair die. | 3.5 | 3.5 | 3.5 | 3.5 | 3.5 | 3.5 | 3.5 | 3.5 |
| 19 | Variance of fair die. | 35/12 | 35/12 | 35/12 | 35/12 | 35/12 | 35/12 | 35/12 | 35/12 |
| 20 | Birthday paradox threshold exceeding 50%. | 23 | 23 | 23 | 23 | 23 | 23 | 23 | 23 |
| 21 | Number of spanning trees of K4. | 16 | 16 | 16 | 16 | 16 | 16 | 16 | 16 |
| 22 | Chromatic number of C5. | 3 | 3 | 3 | 3 | 3 | 3 | 3 | 3 |
| 23 | Maximum edges in triangle-free graph with n=10. | 25 | 25 | 25 | 25 | 25 | 25 | 25 | 25 |
| 24 | Number of binary strings length 8 without consecutive ones. | 55 | 55 | 55 | 55 | 55 | 55 | 55 | 55 |
| 25 | Catalan number for n=5. | 42 | 42 | 42 | 42 | 42 | 42 | 42 | 42 |
| 26 | Derangements of 6. | 265 | 265 | 265 | 265 | 265 | 265 | 265 | 265 |
| 27 | Hamiltonian paths in K4. | 24 | 24 | 24 | 24 | 24 | 24 | 24 | 24 |
| 28 | Perfect matchings in K3,3. | 6 | 6 | 6 | 6 | 6 | 6 | 6 | 6 |
| 29 | Eulerian path existence for degrees [2,2,3,3]. | YES | YES | YES | yes | YES | YES | YES | YES |
| 30 | Minimum vertex cover of star graph with 5 leaves. | 1 | 1 | 1 | 1 | 1 | 1 | 1 | 1 |
| 31 | Expected max of two U(0,1) variables. | 2/3 | 2/3 | 2/3 | 2/3 | 2/3 | 2/3 | 2/3 | 2/3 |
| 32 | Coupon collector expected draws for n=10. | 29.3 | 29.3 | 29.3 | 29.3 | 29.3 | 29.3 | 29.3 | 29.3 |
| 33 | Probability three dice all different. | 5/9 | 5/9 | 5/9 | 5/9 | 5/9 | 5/9 | 5/9 | 5/9 |
| 34 | Probability two reds from urn (5R,3B). | 5/14 | 5/14 | 5/14 | 10/28 | 5/14 | 5/14 | 5/14 | 5/14 |
| 35 | Geometric distribution p=0.25 first success at trial 4. | 27/256 | 27/256 | 27/256 | (3/4)^3*(1/4) | 27/256 | 27/256 | 27/256 | 27/256 |
| 36 | Binomial n=10,p=0.3 exactly 3 successes. | 0.2668 | 0.2668 | 0.2668 | 0.266 | 0.2668 | 0.267 | 0.267 | 0.2668 |
| 37 | Solve φ(100). | 40 | 40 | 40 | 40 | 40 | 40 | 40 | 40 |
| 38 | Smallest perfect number greater than 6. | 28 | 28 | 28 | 28 | 28 | 28 | 28 | 28 |
| 39 | Order of 2 modulo 13. | 12 | 12 | 12 | 12 | 12 | 12 | 12 | 12 |
| 40 | Number of divisors of 1260. | 36 | 36 | 36 | 36 | 36 | 36 | 36 | 36 |
| 41 | Two-pointer container max area [1,8,6,2,5,4,8,3,7]. | 49 | 49 | 49 | 49 | 49 | 49 | 49 | 49 |
| 42 | Game removing 1–3 stones from 20; last loses. First player winning? | YES | YES | YES | Yes | YES | YES | YES | YES |
| 43 | Binary search comparisons finding 23 in sorted array. | 3 | 3 | 3 | 3 | 3 | 3 | 3 | 3 |
| 44 | Recursive fib(5) — number of calls to fib(2). | 3 | 3 | 3 | 3 | 3 | 3 | 3 | 3 |
| 45 | Max heap root from [5,2,8,1,9]. | 9 | 9 | 9 | 9 | 9 | 9 | 9 | 9 |
| 46 | Preorder traversal for given tree structure. | [5,3,2,4,7,8] | [5,3,2,4,7,8] | [5,3,2,4,7,8] | 5,3,2,4,7,8 | [5,3,2,4,7,8] | [5,3,2,4,7,8] | [5,3,2,4,7,8] | [5,3,2,4,7,8] |
| 47 | Shortest path weight A→E in weighted graph. | 7 | 7 | 7 | 7 | 7 | 7 | 7 | 7 |
| 48 | MST total weight given edges list. | 12 | 12 | 12 | 12 | 12 | 12 | 12 | 12 |
| 49 | Leaves in perfect binary tree with 15 nodes. | 8 | 8 | 8 | 8 | 8 | 8 | 8 | 8 |
| 50 | In-degree of node C given directed edges. | 3 | 3 | 3 | 3 | 3 | 3 | 3 | 3 |
| 51 | Number of strongly connected components given graph. | 2 | 2 | 2 | 2 | 2 | 2 | 2 | 2 |
| 52 | Knapsack capacity 10 with given items — max value. | 13 | 13 | 13 | 13 | 13 | 13 | 13 | 13 |
| 53 | Ways to climb 5 steps with 1 or 2 steps. | 8 | 8 | 8 | 8 | 8 | 8 | 8 | 8 |
| 54 | LCS length for “ABCDGH” and “AEDFHR”. | 3 | 3 | 3 | 3 | 3 | 3 | 3 | 3 |
| 55 | Edit distance between “kitten” and “sitting”. | 3 | 3 | 3 | 3 | 3 | 3 | 3 | 3 |
| 56 | Car acceleration problem reaching 24 m/s. | 6 | 6 | 6 s | 6 | 6 | 6 | 6 | 6 |
| 57 | Arrangements of “MISSISSIPPI”. | 34650 | 34650 | 34650 | 34650 | 34650 | 34650 | 34650 | 34650 |
| 58 | Combination choose 3 from 10. | 120 | 120 | 120 | 120 | 120 | 120 | 120 | 120 |
| 59 | Graph colouring minimum colours given adjacency. | 3 | 3 | 3 | 3 | 3 | 3 | 3 | 3 |
| 60 | Binary trees with 4 nodes. | 14 | 14 | 14 | 14 | 14 | 14 | 14 | 14 |
| 61 | Chromatic polynomial of P3 at k=3. | 12 | 12 | 12 | 12 | 12 | 12 | 12 | 12 |
| 62 | Maximum independent set in cycle C6. | 3 | 3 | 3 | 3 | 3 | 3 | 3 | 3 |
| 63 | Cryptarithm SEND+MORE=MONEY — value of M. | 1 | 1 | 1 | 1 | 1 | 1 | 1 | 1 |
| 64 | 4-Queens solutions count. | 2 | 2 | 2 | 2 | 2 | 2 | 2 | 2 |
| 65 | SAT problem satisfiable? (given clauses). | YES | YES | YES | Yes | YES | YES | YES | YES |
| 66 | In a 3×3 magic square using integers 3 through 11, what is the centre value? | 7 | 7 | 7 | 7 | 7 | 7 | 7 | 7 |
| 67 | Rectangle perimeter 40 — max inscribed circle radius. | 5 | 5 | 5 | 5 | 5 | 5 | 5 | 5 |
| 68 | Smallest square satisfying multiple mod conditions. | 1 | 1 | 1 | 1 | 1 | 1 | 1 | 1 |
| 69 | Alice vs Bob alternating coin probability. | 2/3 | 2/3 | 2/3 | 2/3 | 2/3 | 2/3 | 2/3 | 2/3 |
| 70 | Graph with degree constraints — edge count. | 14 | 14 | 14 | 14 | 14 | 14 | 14 | 14 |
| 71 | Chinese remainder system x≡2 mod5, x≡3 mod7, x≡4 mod9. | 157 | 157 | 157 | 188 | 157 | 157 | 157 | 157 |
| 72 | Count integers 1–100 coprime with 30. | 26 | 26 | 26 | 8 | 26 | 26 | 26 | 26.00 |
| 73 | Solve 13x≡5 mod17. | 3 | 3 | 3 | 3 | 3 | 3 | 3 | 3 |
| 74 | Smallest number divisible by 12 and 18 with digit sum 9. | 36 | 36 | 36 | 36 | 36 | 36 | 36 | 36 |
| 75 | Coin change [1,3,7,12] for total 25 minimal coins. | 3 | 3 | 3 | 3 | 3 | 3 | 3 | 3 |
| 76 | Logic pets/cats/fish oxygen puzzle. | 4 | 4 | 4 | 4 | 4 | 4 | 4 | 4 |
| 77 | Energy conservation spring compression. | 1 | 1 | 1 | 5m | 1 | 1 | 1 | 1 |
| 78 | Hat derangement probability exactly 2 fixed. | 1/6 | 1/6 | 1/6 | 3/20 | 1/6 | 1/6 | 1/6 | 1/6 |
| 79 | Compute 20^3 \mod 33. | 14 | 14 | 14 | 14 | 14 | 14 | 14 | 14 |
| 80 | Algorithm nested loop complexity. | O(n^3) | O(n^3) | O(n^3) | O(n^3) | O(n^3) | O(n^3) | O(n^3) | O(n^3) |
| 81 | Triangle max area perimeter 12. | 6.93 | 6.93 | 4√3 | 4√3 | 6.93 | 6.93 | 6.93 | 6.93 |
| 82 | Jug measuring reachable quantities. | 8 | 8 | 8 | 8 | 8 | 8 | 8 | 8 |
| 83 | Bayesian disease probability. | 16.1 | 16.1 | 16.1 | 16% | 16.1 | 16.1 | 16.1 | 16.1 |
| 84 | Towers of Hanoi moves for 4 disks. | 15 | 15 | 15 | 15 | 15 | 15 | 15 | 15 |
| 85 | Farmer fox chicken grain crossings minimum. | 7 | 7 | 7 | 7 | 7 | 7 | 7 | 7 |
| 86 | Euler totient φ(30). | 8 | 8 | 8 | 8 | 8 | 8 | 8 | 8 |
| 87 | Probability sum=7 with dice. | 1/6 | 1/6 | 1/6 | 1/6 | 1/6 | 1/6 | 1/6 | 1/6 |
| 88 | Expected flips for two consecutive heads. | 6 | 6 | 6 | 6 | 6 | 6 | 6 | 6 |
| 89 | Probability exactly two heads in 3 flips. | 3/8 | 3/8 | 3/8 | 3/8 | 3/8 | 3/8 | 3/8 | 3/8 |
| 90 | Binary search tree inorder traversal example. | 1,2,3,4,5 | 1,2,3,4,5 | 1,2,3,4,5 | 1,2,3,4,5 | 1,2,3,4,5 | 1,2,3,4,5 | 1,2,3,4,5 | 1,2,3,4,5 |

S4 Ground truth Matching:

| S3 Matching entries | | | | | | S4 |  |  |
| --- | --- | --- | --- | --- | --- | --- | --- | --- |
| Chat GPt | Claud | perplexicity | grok | Deep seek | Gemini | S4 Final | Question | S. No |
| 0 | 0 | 0 | 1 | 0 | 0 | 0 | Find smallest positive integer n such that:n ≡ 1 \mod 6, n ≡ 3 \mod 8, n ≡ 5 \mod 9. | 1 |
| 0 | 0 | 0 | 0 | 0 | 0 | 0 | Smallest integer whose digit sum equals 18 and divisible by 72. | 2 |
| 0 | 0 | 0 | 0 | 0 | 1 | 0 | Smallest n>1 such that n^2 ≡ 1 \mod 105. | 3 |
| 0 | 0 | 0 | 0 | 0 | 1 | 0 | Solve 17x ≡ 1 \mod 43. | 4 |
| 0 | 0 | 0 | 0 | 0 | 0 | 0 | Three persons make statements: Alice: “Bob lies.” Bob: “Charlie lies.” Charlie: “Exactly two tell the truth.” ,Who tells truth? | 5 |
| 0 | 0 | 0 | 0 | 0 | 0 | 0 | Box A: “Gold is in box C.”, Box B: “Gold is not in box C.”, Box C: “Gold is not in box B..” Exactly ONE label is true. Which box contains gold? | 6 |
| 0 | 0 | 0 | 0 | 0 | 0 | 0 | Find smallest integer divisible by 3,5,7 whose digit sum is 9. | 7 |
| 0 | 0 | 0 | 0 | 0 | 0 | 0 | Container heights [1,8,6,2,5,4,8,3,7]; maximum water area. | 8 |
| 0 | 0 | 0 | 0 | 0 | 0 | 0 | Find smallest integer whose reverse equals three times itself. | 9 |
| 0 | 0 | 0 | 0 | 0 | 0 | 0 | BST inorder traversal for tree defined by insert order [5,3,7,2,4,8]. | 10 |
| 0 | 0 | 0 | 0 | 0 | 0 | 0 | Solve gcd(123456,789012). | 11 |
| 0 | 0 | 0 | 0 | 0 | 0 | 0 | Solve lcm(84,120). | 12 |
| 0 | 0 | 0 | 0 | 0 | 0 | 0 | Find next prime after 97. | 13 |
| 0 | 0 | 0 | 0 | 0 | 0 | 0 | How many trailing zeros in 500!? | 14 |
| 0 | 0 | 0 | 0 | 0 | 0 | 0 | Monty Hall with 3 doors — switch or stay? | 15 |
| 0 | 0 | 0 | 0 | 0 | 0 | 0 | Expected flips until first head for fair coin. | 16 |
| 0 | 0 | 0 | 0 | 0 | 0 | 0 | Probability two dice sum equals 8. | 17 |
| 0 | 0 | 0 | 0 | 0 | 0 | 0 | Expected value of fair die. | 18 |
| 0 | 0 | 0 | 0 | 0 | 0 | 0 | Variance of fair die. | 19 |
| 0 | 0 | 0 | 0 | 0 | 0 | 0 | Birthday paradox threshold exceeding 50%. | 20 |
| 0 | 0 | 0 | 0 | 0 | 0 | 0 | Number of spanning trees of K4. | 21 |
| 0 | 0 | 0 | 0 | 0 | 0 | 0 | Chromatic number of C5. | 22 |
| 0 | 0 | 0 | 0 | 0 | 0 | 0 | Maximum edges in triangle-free graph with n=10. | 23 |
| 0 | 0 | 0 | 0 | 0 | 0 | 0 | Number of binary strings length 8 without consecutive ones. | 24 |
| 0 | 0 | 0 | 0 | 0 | 0 | 0 | Catalan number for n=5. | 25 |
| 0 | 0 | 0 | 0 | 0 | 0 | 0 | Derangements of 6. | 26 |
| 0 | 0 | 0 | 0 | 0 | 0 | 0 | Hamiltonian paths in K4. | 27 |
| 0 | 0 | 0 | 0 | 0 | 0 | 0 | Perfect matchings in K3,3. | 28 |
| 0 | 0 | 0 | 0 | 0 | 0 | 0 | Eulerian path existence for degrees [2,2,3,3]. | 29 |
| 0 | 0 | 0 | 0 | 0 | 0 | 0 | Minimum vertex cover of star graph with 5 leaves. | 30 |
| 0 | 0 | 0 | 0 | 0 | 0 | 0 | Expected max of two U(0,1) variables. | 31 |
| 0 | 0 | 0 | 0 | 0 | 0 | 0 | Coupon collector expected draws for n=10. | 32 |
| 0 | 0 | 0 | 0 | 0 | 0 | 0 | Probability three dice all different. | 33 |
| 0 | 0 | 0 | 0 | 0 | 0 | 0 | Probability two reds from urn (5R,3B). | 34 |
| 0 | 0 | 0 | 0 | 0 | 0 | 0 | Geometric distribution p=0.25 first success at trial 4. | 35 |
| 0 | 0 | 0 | 0 | 0 | 0 | 0 | Binomial n=10,p=0.3 exactly 3 successes. | 36 |
| 0 | 0 | 0 | 0 | 0 | 0 | 0 | Solve φ(100). | 37 |
| 0 | 0 | 0 | 0 | 0 | 0 | 0 | Smallest perfect number greater than 6. | 38 |
| 0 | 0 | 0 | 0 | 0 | 0 | 0 | Order of 2 modulo 13. | 39 |
| 0 | 0 | 0 | 0 | 0 | 0 | 0 | Number of divisors of 1260. | 40 |
| 0 | 0 | 0 | 0 | 0 | 0 | 0 | Two-pointer container max area [1,8,6,2,5,4,8,3,7]. | 41 |
| 0 | 0 | 0 | 0 | 0 | 0 | 0 | Game removing 1–3 stones from 20; last loses. First player winning? | 42 |
| 0 | 0 | 0 | 0 | 0 | 0 | 0 | Binary search comparisons finding 23 in sorted array. | 43 |
| 0 | 0 | 0 | 0 | 0 | 0 | 0 | Recursive fib(5) — number of calls to fib(2). | 44 |
| 0 | 0 | 0 | 0 | 0 | 0 | 0 | Max heap root from [5,2,8,1,9]. | 45 |
| 0 | 0 | 0 | 0 | 0 | 0 | 0 | Preorder traversal for given tree structure. | 46 |
| 0 | 0 | 0 | 0 | 0 | 0 | 0 | Shortest path weight A→E in weighted graph. | 47 |
| 0 | 0 | 0 | 0 | 0 | 0 | 0 | MST total weight given edges list. | 48 |
| 0 | 0 | 0 | 0 | 0 | 0 | 0 | Leaves in perfect binary tree with 15 nodes. | 49 |
| 0 | 0 | 0 | 0 | 0 | 0 | 0 | In-degree of node C given directed edges. | 50 |
| 0 | 0 | 0 | 0 | 0 | 0 | 0 | Number of strongly connected components given graph. | 51 |
| 0 | 0 | 0 | 0 | 0 | 0 | 0 | Knapsack capacity 10 with given items — max value. | 52 |
| 0 | 0 | 0 | 0 | 0 | 0 | 0 | Ways to climb 5 steps with 1 or 2 steps. | 53 |
| 0 | 0 | 0 | 0 | 0 | 0 | 0 | LCS length for “ABCDGH” and “AEDFHR”. | 54 |
| 0 | 0 | 0 | 0 | 0 | 0 | 0 | Edit distance between “kitten” and “sitting”. | 55 |
| 0 | 0 | 0 | 0 | 0 | 0 | 0 | Car acceleration problem reaching 24 m/s. | 56 |
| 0 | 0 | 0 | 0 | 0 | 0 | 0 | Arrangements of “MISSISSIPPI”. | 57 |
| 0 | 0 | 0 | 0 | 0 | 0 | 0 | Combination choose 3 from 10. | 58 |
| 0 | 0 | 0 | 0 | 0 | 0 | 0 | Graph colouring minimum colours given adjacency. | 59 |
| 0 | 0 | 0 | 0 | 0 | 0 | 0 | Binary trees with 4 nodes. | 60 |
| 0 | 0 | 0 | 0 | 0 | 0 | 0 | Chromatic polynomial of P3 at k=3. | 61 |
| 0 | 0 | 0 | 0 | 0 | 0 | 0 | Maximum independent set in cycle C6. | 62 |
| 0 | 0 | 0 | 0 | 0 | 0 | 0 | Cryptarithm SEND+MORE=MONEY — value of M. | 63 |
| 0 | 0 | 0 | 0 | 0 | 0 | 0 | 4-Queens solutions count. | 64 |
| 0 | 0 | 0 | 0 | 0 | 0 | 0 | SAT problem satisfiable? (given clauses). | 65 |
| 0 | 0 | 0 | 0 | 0 | 0 | 0 | In a 3×3 magic square using integers 3 through 11, what is the centre value? | 66 |
| 0 | 0 | 0 | 0 | 0 | 0 | 0 | Rectangle perimeter 40 — max inscribed circle radius. | 67 |
| 0 | 0 | 0 | 0 | 0 | 0 | 0 | Smallest square satisfying multiple mod conditions. | 68 |
| 0 | 0 | 0 | 0 | 0 | 0 | 0 | Alice vs Bob alternating coin probability. | 69 |
| 0 | 0 | 0 | 0 | 0 | 0 | 0 | Graph with degree constraints — edge count. | 70 |
| 0 | 0 | 1 | 0 | 0 | 0 | 0 | Chinese remainder system x≡2 mod5, x≡3 mod7, x≡4 mod9. | 71 |
| 0 | 0 | 1 | 0 | 0 | 0 | 0 | Count integers 1–100 coprime with 30. | 72 |
| 0 | 0 | 0 | 0 | 0 | 0 | 0 | Solve 13x≡5 mod17. | 73 |
| 0 | 0 | 0 | 0 | 0 | 0 | 0 | Smallest number divisible by 12 and 18 with digit sum 9. | 74 |
| 0 | 0 | 0 | 0 | 0 | 0 | 0 | Coin change [1,3,7,12] for total 25 minimal coins. | 75 |
| 0 | 0 | 0 | 0 | 0 | 0 | 0 | Logic pets/cats/fish oxygen puzzle. | 76 |
| 0 | 0 | 1 | 0 | 0 | 0 | 0 | Energy conservation spring compression. | 77 |
| 0 | 0 | 1 | 0 | 0 | 0 | 0 | Hat derangement probability exactly 2 fixed. | 78 |
| 0 | 0 | 0 | 0 | 0 | 0 | 0 | Compute 20^3 \mod 33. | 79 |
| 0 | 0 | 0 | 0 | 0 | 0 | 0 | Algorithm nested loop complexity. | 80 |
| 0 | 0 | 0 | 0 | 0 | 0 | 0 | Triangle max area perimeter 12. | 81 |
| 0 | 0 | 0 | 0 | 0 | 0 | 0 | Jug measuring reachable quantities. | 82 |
| 0 | 0 | 0 | 0 | 0 | 0 | 0 | Bayesian disease probability. | 83 |
| 0 | 0 | 0 | 0 | 0 | 0 | 0 | Towers of Hanoi moves for 4 disks. | 84 |
| 0 | 0 | 0 | 0 | 0 | 0 | 0 | Farmer fox chicken grain crossings minimum. | 85 |
| 0 | 0 | 0 | 0 | 0 | 0 | 0 | Euler totient φ(30). | 86 |
| 0 | 0 | 0 | 0 | 0 | 0 | 0 | Probability sum=7 with dice. | 87 |
| 0 | 0 | 0 | 0 | 0 | 0 | 0 | Expected flips for two consecutive heads. | 88 |
| 0 | 0 | 0 | 0 | 0 | 0 | 0 | Probability exactly two heads in 3 flips. | 89 |
| 0 | 0 | 0 | 0 | 0 | 0 | 0 | Binary search tree inorder traversal example. | 90 |
|  |  |  |  |  |  | 0.0 |  |  |
|  |  |  |  |  |  | 0.0 |  |  |
| 100.0 | 100.0 | 100.0 | 100.0 | 100.0 | 100.0 | 100.0 |  |  |
| **96.7** | **97.8** | **78.9** | **95.6** | **97.8** | **91.1** | 93.0 |  |  |
| 97.8 | 98.9 | 81.1 | 96.7 | 98.9 | 93.3 | 94.5 |  |  |
| 100 | 100 | 95.6 | 98.9 | 100 | 97.8 | 98.7 |  |  |
|  |  |  |  |  |  | 100 |  |  |
