# Supplementary material
Source: Research Square preprint supplement (doi:10.21203/rs.3.rs-9070952/v1)
Supplement: Supplementary file 3 [file 98dc83107f36ee9096b1d7bc.xlsx]

## Sheet: Table A — Cross-Study Meta
Claude	0.978	0.917	0.936	1.5	1	1	0.903	✓
Grok	0.956	0.783	0.896	4	3	2	0.626	✗
ChatGPT	0.967	0.767	0.714	3	4	3	0.4	✗
Gemini	0.911	0.833	0.674	5	2	4	0.703	✓
DeepSeek	0.978	0.75	0.435	1.5	5	5	0.331	✗
Perplexity	0.789	0.7	0.352	6	6	6	0.346	✗
TABLE A | Cross-Domain Reliability Profiles — Three-Study Programme
Study 1 (S1) = single-agent baseline | Study 2 (S2) = cross-run mean (R1–R3) | Study 3 (S3) = composite (V1+V3+V4-CI)/3 | S4 excluded (cross-model; not per-model) | Ranked 1 (best) → 6 (worst) within each study
Model	Study 1 (%)	Study 2 (%)	Study 3 (%)	Equal-Wt Composite (%)	Difficulty-Wt Composite (%)	Rank Study 1	Rank Study 2	Rank Study 3	Rank Std Dev	ρs (Study 2)	Auditor Eligible?
Claude	0.978	0.917	0.936	0.943667	0.93775	1.5	1	1	0.288675	0.903	✓
Grok	0.956	0.783	0.896	0.878333	0.86845	4	3	2	1	0.626	✗
ChatGPT	0.967	0.767	0.714	0.816	0.78315	3	4	3	0.57735	0.4	✗
Gemini	0.911	0.833	0.674	0.806	0.77705	5	2	4	1.52753	0.703	✓
DeepSeek	0.978	0.75	0.435	0.721	0.65385	1.5	5	5	2.02073	0.331	✗
Perplexity	0.789	0.7	0.352	0.613667	0.5612	6	6	6	0	0.346	✗
Grand Mean	0.929833	0.791667	0.667833	0.796444	0.763575
Statistical note: Friedman χ² = 9.33, df = 5, p = 0.009 | Rank 1 (Claude) and Rank 6 (Perplexity) invariant across all 8 weighting scenarios | Spearman S2 vs S3: ρ = +0.829, p = 0.042 | Difficulty weights: formal × 0.20, semi-det. × 0.35, indeterminate × 0.45

## Sheet: Table B — Study 1 Architecture
TABLE B | Study 1 — Architectural Progression (Same-Model, All Scenarios)
S1 = Single-agent baseline | S2 = Self-consistency 3-attempt (same model) | S3 = GAAS four-role architecture (same model) | S4 = Cross-model role diversity — programme-level result ONLY, not per-model
Model	S1: Single-Agent Baseline (%)	S2: Self-Consistency 3× Same Model (%)	S3: GAAS Same-Model (%)	Gain S1→S3 (pp)	Errors Eliminated	S1→S2 Δpp (n.s.)	S2→S3 Δpp (sig.)	S4 Role (cross-model)	Notes
Claude	0.978	0.989	1	2.2	-1	1.1	1.1	Generator	Generator in S4; S3=100%	0.978	0.989	1
DeepSeek	0.978	0.989	1	2.2	-1	1.1	1.1	Auditor	Auditor in S4; collapses in Study 3 (43.5%)	0.978	0.989	1
ChatGPT	0.967	0.978	1	3.3	-1	1.1	2.2	Synthesizer	Synthesizer in S4; S3=100%	0.967	0.978	1
Grok	0.956	0.967	0.989	3.3	-0.75	1.1	2.2	—	No S4 role assigned	0.956	0.967	0.989
Gemini	0.911	0.933	0.978	6.7	-0.752809	2.2	4.5	—	No S4 role assigned; calibration inversion in Study 3	0.911	0.933	0.978
Perplexity	0.789	0.811	0.956	16.7	-0.791469	2.2	14.5	Adversary	Adversary in S4; frozen-retrieval failure in Study 3	0.789	0.811	0.956
Mean	0.929833	0.9445	0.987167
S4 Cross-Model (programme total)	—	—	100.0%	+1.3 pp	100%	—	—	All 4 models	ρ̂=0.00; n=90; 95% CI 95.9-100%
METHODOLOGY NOTE: S4 (cross-model role diversity) achieved 100% — but this is a PROGRAMME-LEVEL result. The four roles were split across different models (Claude=Generator, DeepSeek=Auditor, Perplexity=Adversary, ChatGPT=Synthesizer). No individual model score can be attributed to S4. Therefore S4 is EXCLUDED from Table A (per-model cross-study comparison). The Study 1 column in Table A uses S1 b…

## Sheet: Table C — Study 2 Calibration
TABLE C | Study 2 — Semi-Determinate Domains: Run-Level Detail & Auditor Calibration
180 evaluations × 3 criteria = 540 individually scored observations | Spearman ρs = correlation between model's claimed vs actual performance across 30 observations | Auditor threshold: ρs ≥ 0.70 | κ = 0.81 (independent dual scoring)
Model	Run 1 (%)	Run 2 (%)	Run 3 (%)	Cross-Run Mean (%)	Spearman ρs	Auditor Eligible?	Audit Behaviour	Error Types Observed
Claude	0.9	0.9	0.95	0.916667	0.903	✓ YES	Calibrated (slight inflation)	All three types — lowest frequency	0.9	0.9	0.95	0.903
Gemini	0.75	0.9	0.85	0.833333	0.703	✓ YES	Systematic inflation	Type I dominant (instrument recall)	0.75	0.9	0.85	0.703
Grok	0.8	0.8	0.75	0.783333	0.626	✗ NO	Extreme systematic deflation	Type II (causal hierarchy) — deflates correct answers	0.8	0.8	0.75	0.626
ChatGPT	0.8	0.8	0.7	0.766667	0.4	✗ NO	Inconsistent (bi-directional)	Types I and II mixed — inconsistent run-to-run	0.8	0.8	0.7	0.4
DeepSeek	0.75	0.75	0.75	0.75	0.331	✗ NO	Incoherent (run-to-run reversal)	Types I, II, III — incoherent self-assessment	0.75	0.75	0.75	0.331
Perplexity	0.7	0.7	0.7	0.7	0.346	✗ NO	Late-run deflation collapse	Type III dominant (molecular-code specificity)	0.7	0.7	0.7	0.346
Grand Mean	0.783333	0.808333	0.783333	0.791667
CALIBRATION-FIRST PRINCIPLE: ρs ≥ 0.70 is the minimum prerequisite for Auditor-role assignment. Only Claude (0.903) and Gemini (0.703) qualify. Grok (0.626) systematically DEFLATES performance claims — deploying it as Auditor generates false-rejection cascades on correct answers. ChatGPT, DeepSeek, Perplexity disqualified.

## Sheet: Table D — Study 3 Indeterminate
TABLE D | Study 3 — Indeterminate Domains: Protocol-Level Performance
2,730 data points across 142 sessions | V1: 72 sessions (formula fidelity) | V2 withdrawn before evaluation (structural prompt deficiency) | V3: 34 sessions (live data + protocol compliance) | V4: 36 sessions (90% CI predictions) | Composite = (V1 + V3 + V4-CI) / 3 | κ = 0.84 | V4-PE = point-estimate MAE% (lower = better)
Model	V1: Formula Fidelity (%)	V3: Live Data + Protocol (%)	V4-CI: 90% CI Hit Rate (%)	V4-PE: Point Estimate MAE% (↓ better)	Composite (V1+V3+V4-CI)/3	Rank (Composite)	Grade	Dominant Failure Mode	Notes
Claude	0.967	1	0.842	6.1	0.936333	1	A+	None identified — deployment-safe	84.2% CI hit rate = best in programme; used as GAAS Auditor proxy	0.967	1	0.842	6.1
Grok	0.95	0.967	0.771	7.5	0.896	2	A	Slight CI underconfidence	Strong V1/V3; 77.1% CI rate — well above DeepSeek/Gemini/Perplexity	0.95	0.967	0.771	7.5
ChatGPT	0.508	0.8	0.833	7.7	0.713667	3	A−	V1 accuracy gap (50.8%); CI calibration strong	CI calibration (83.3%) nearly matches Claude; V1 weakness offsets	0.508	0.8	0.833	7.7
Gemini	0.758	0.967	0.297	5.3	0.674	4	B†	CALIBRATION INVERSION: Rank 1 accuracy, Rank 5 CI (29.7% vs 90% target = −60 pp)	5.3% MAE (rank 1 accuracy) vs 29.7% CI coverage — structural training objective flaw	0.758	0.967	0.297	5.3
DeepSeek	0.542	0.45	0.314	14.2	0.435333	5	D	Training-cutoff anchor: 12–13% systematic S&P 500 error	3 of 4 S&P sessions unusable due to staleness; 43.5% composite lowest in Study 3	0.542	0.45	0.314	14.2
Perplexity	0.2	0.567	0.29	13.3	0.352333	6	C	FROZEN RETRIEVAL: identical predictions across consecutive sessions	20.0% V1 accuracy — lowest in study; frozen retrieval makes live data deployment unsafe	0.2	0.567	0.29	13.3
CALIBRATION INVERSION (Gemini V4): Highest point-estimate accuracy (5.3% MAE, Rank 1) combined with second-worst CI calibration (29.7% hit rate vs 90% target = −60 pp below target). Gemini's average S&P 500 90% CI spans ~98 points; a genuinely calibrated 90% CI requires ~500 points (5× wider). This is a structural training-objective flaw — optimising central tendency provides no signal about dist…

## Sheet: Audit Trail
AUDIT TRAIL — Data Sanity & Methodology Decisions
Item	Decision	Reason	Source	Status	Session
S4 excluded from Table A	Table A uses S1 single-agent baseline ONLY for Study 1 column	S4 is cross-model (4 different models in 4 roles); no individual model score is attributable	JMLR Table 5 + user GAAS methodology	✓ CONFIRMED	Phase 4
S1-only vs S1+S2+S3 composite for Study 1	S1 baseline only used in Table A	Studies 2 & 3 measured single-agent only; cross-study comparison requires identical methodological basis	Methodology parity principle	✓ CONFIRMED	Phase 4
Study 1 S3 GAAS shown in Table B	Full S1/S2/S3 architectural progression in separate Table B	Preserves architectural insight without contaminating cross-study comparison	User instruction Phase 4	✓ CONFIRMED	Phase 4
Rank SD with ddof=1 and tied ranks averaged	Claude/DeepSeek both 97.8% in Study 1 → tied rank 1.5	ddof=0 (population SD) was wrong; sample SD (ddof=1) is correct for n=3 studies	Statistical correction Phase 2	✓ CORRECTED	Phase 2
Orthogonality claim retracted	S1 vs S3 Spearman ρ = +0.493 (positive, p=0.32, n.s.) — NOT negative	Previous session incorrectly reported negative correlation; verified by Python recomputation	Python verification Phase 2	✓ RETRACTED	Phase 2
Gemini CI calibration = second-worst (not worst)	Perplexity 29.0% is worst; Gemini 29.7% is second-worst	Abstract previously said 'worst' — corrected to 'second-worst'	NMI Table 3	✓ CORRECTED	Phase 1
Bangladesh (not Germany) for 168M error comparator	Bangladesh ~172M population matches 168M eliminated errors at 99% accuracy	Germany 84M was wrong comparator; correctly labels 84M bar at 97% accuracy	Population data	✓ CORRECTED	Phase 1
R1/R2/R3 column headers renamed	Now: Rank Study 1 / Rank Study 2 / Rank Study 3	R1/R2/R3 ambiguous and not self-explanatory to reader	User feedback Phase 4	✓ CORRECTED	Phase 4
V2 protocol gap explained	Parenthetical added in Study 3 Results: V2 withdrawn before evaluation	Numbering V1→V3→V4 would prompt reviewer question without explanation	User GAAS review Phase 3	✓ ADDED	Phase 3
'Universal law' heading corrected	Changed to 'unified framework' to match title	Title uses 'framework'; 'law' in heading was internal contradiction	GAAS review Phase 3	✓ CORRECTED	Phase 3
